# Supplementary material for: Analysis of eight types of RNA modification regulators and their correlation with the prognosis in hepatocellular carcinoma
Source: Front Genet. 2023 Mar 16;14:1127301. doi: 10.3389/fgene.2023.1127301 (PMC10060831; doi:10.3389/fgene.2023.1127301)
Supplement: Supplementary file 1 [file Table1.XLSX]

## Sheet: Sheet1
Table 1. 100 RNA regulators of eight types of RNA modifications included in this study.
Gene.Name	Modification	Type
METTL3	M6A	Writer
METTL14	M6A	Writer
METTL16	M6A	Writer
WTAP	M6A	Writer
KIAA1429	M6A	Writer
RBM15	M6A	Writer
RBM15B	M6A	Writer
ZCCHC4	M6A	Writer
ZC3H13	M6A	Writer
METTL5	M6A	Writer
CBLL1	M6A	Writer
YTHDF1	M6A	Reader
YTHDF2	M6A	Reader
YTHDF3	M6A	Reader
YTHDC1	M6A	Reader
YTHDC2	M6A	Reader
HNRNPA1	M6A	Reader
HNRNPA2B1	M6A	Reader
HNRNPC	M6A	Reader
IGF2BP1	M6A	Reader
IGF2BP2	M6A	Reader
IGF2BP3	M6A	Reader
NKAP	M6A	Reader
EIF3A	M6A	Reader
FMR1	M6A	Reader
ELAVL1	M6A	Reader
G3BP1	M6A	Reader
G3BP2	M6A	Reader
PRRC2A	M6A	Reader
RBMX	M6A	Reader
LRPPRC	M6A	Reader
FTO	M6A	Eraser
ALKBH5	M6A	Eraser
NSUN2	M5C	Writer
NSUN3	M5C	Writer
NSUN6	M5C	Writer
NSUN7	M5C	Writer
NOP2	M5C	Writer
NSUN4	M5C	Writer
NSUN5	M5C	Writer
DNMT1	M5C	Writer
TRDMT1	M5C	Writer
DNMT3A	M5C	Writer
DNMT3B	M5C	Writer
ALYREF	M5C	Reader
YBX1	M5C	Reader
TET1	M5C	Eraser
TET3	M5C	Eraser
TET2	M5C	Eraser
TRMT6	M1A	Writer
TRMT61A	M1A	Writer
TRMT61B	M1A	Writer
TRMT10A	M1A	Writer
TRMT10B	M1A	Writer
TRMT10C	M1A	Writer
RRP8	M1A	Writer
ALKBH1	M1A	Eraser
ALKBH3	M1A	Eraser
CMTR1	Nm	Writer
FBL	Nm	Writer
TRMT44	Nm	Writer
TRMT13	Nm	Writer
TARBP1	Nm	Writer
FTSJ1	Nm	Writer
SNORD48	Nm	Writer
HENMT1	Nm	Writer
CMTR2	Nm	Writer
FBLL1	Nm	Writer
FTSJ3	Nm	Writer
MRM1	Nm	Writer
MRM2	Nm	Writer
MRM3	Nm	Writer
TRMT11	Nm	Writer
METTL1	M7G	Writer
WDR4	M7G	Writer
BUD23	M7G	Writer
RNMT	M7G	Writer
TRMT112	M7G	Writer
TGS1	M7G	Writer
PUS1	Ψ	Writer
PUS3	Ψ	Writer
TRUB1	Ψ	Writer
PUS7	Ψ	Writer
PUS10	Ψ	Writer
PUS7L	Ψ	Writer
RPUSD1	Ψ	Writer
RPUSD2	Ψ	Writer
RPUSD3	Ψ	Writer
RPUSD4	Ψ	Writer
DKC1	Ψ	Writer
ADAR	A-to-I	Writer
ADARB1	A-to-I	Writer
ADAT2	A-to-I	Writer
ADAT3	A-to-I	Writer
ADARB2	A-to-I	Writer
ELP1	mcm5s2U	Writer
ELP3	mcm5s2U	Writer
ALKBH8	mcm5s2U	Writer
CTU1	mcm5s2U	Writer
CTU2	mcm5s2U	Writer

## Sheet: Sheet2
Table 2: The list of 1472 differentially expressed genes between two clusters.
gene	lowMean	highMean	logFC	pValue	fdr
AC099850.4	0.870697	3.89785	2.16244	3.65413e-36	2.64847e-34
C6	66.3049	21.1571	-1.64798	1.12839e-27	1.56729e-26
IGHJ3	1.48897	6.19665	2.05717	0.000361128	0.000508685
MPZL1	7.13182	15.0059	1.07319	1.30957e-28	2.10499e-27
RHPN1	1.2336	2.99151	1.278	5.84307e-11	1.41998e-10
CD79A	1.10123	4.59793	2.06187	0.000268207	0.000381482
ELP1	4.82205	10.5645	1.13151	8.35672e-25	7.87534e-24
FZD1	0.685868	2.58943	1.91663	1.86698e-16	7.17227e-16
AL035461.3	1.36647	3.12226	1.19214	7.0452e-17	2.8292e-16
CORO1A	3.96297	8.00494	1.01431	3.27136e-06	5.4465e-06
FUBP1	4.71714	9.85809	1.0634	5.80684e-33	1.9078e-31
CAMSAP2	2.10287	4.26024	1.01858	6.30085e-23	4.70067e-22
S100A11	62.0099	201.021	1.69678	4.10767e-09	8.63789e-09
KCNK5	2.69407	6.5733	1.28683	0.000333567	0.00047136
TNFRSF11B	1.76214	5.52745	1.64929	0.000104642	0.000154286
DACT2	1.30214	2.95822	1.18384	1.99843e-06	3.38659e-06
IQGAP3	1.87243	4.34266	1.21367	2.33776e-18	1.08488e-17
RAB3D	1.01467	2.77319	1.45053	5.33079e-13	1.53247e-12
NIBAN2	8.7811	21.0205	1.25932	3.70392e-12	9.97639e-12
HLA-DQB2	2.37484	5.41333	1.18868	6.1025e-07	1.08038e-06
PRKX	0.764816	2.01512	1.39768	1.03621e-11	2.69803e-11
MXD1	1.25425	2.56939	1.0346	1.45793e-19	7.62704e-19
AL162582.1	2.48206	0.856457	-1.53509	1.1709e-07	2.19308e-07
SPINT1-AS1	0.437209	2.19997	2.33109	1.06271e-08	2.16691e-08
HOMER3	2.4157	6.60105	1.45026	2.82593e-15	9.74488e-15
TUSC3	1.44776	4.04884	1.48369	3.00109e-05	4.6274e-05
PROSER1	1.27949	2.74485	1.10116	1.37375e-30	3.02554e-29
PDCD1	0.61538	2.37636	1.9492	8.41638e-09	1.72651e-08
SOGA1	0.801036	2.00279	1.32207	1.31903e-25	1.38492e-24
TUBB6	2.81036	6.19588	1.14055	3.2245e-06	5.37147e-06
PROM1	0.110456	2.58507	4.54867	1.03562e-13	3.14899e-13
NIPA1	1.44418	2.99631	1.05293	3.98457e-18	1.81253e-17
EXO1	0.712637	2.18686	1.61762	8.58828e-29	1.41861e-27
ANXA13	3.94141	15.4775	1.97339	1.16625e-10	2.76699e-10
ZBTB12	1.05755	3.32169	1.6512	1.2585e-34	5.97238e-33
STEAP2	0.872867	1.94055	1.15263	1.78068e-08	3.56466e-08
SEPTIN2	14.0916	28.6147	1.02192	2.51415e-28	3.89465e-27
CEP192	0.839457	1.73353	1.04619	2.12332e-30	4.4943e-29
HTRA3	1.86142	4.09175	1.13632	1.65363e-05	2.60036e-05
ZNF667-AS1	0.805852	1.84337	1.19376	0.000102741	0.000151558
LINGO1	0.958641	3.02672	1.65869	6.12094e-13	1.74995e-12
ABCB4	21.5289	7.69916	-1.4835	5.82804e-22	3.95335e-21
ZNF761	1.1178	2.95803	1.40397	1.15825e-32	3.62606e-31
PEG10	9.56508	66.5931	2.79952	2.2577e-16	8.60689e-16
WIPF1	1.58415	3.28034	1.05014	6.90873e-10	1.54087e-09
SOBP	0.618262	1.9895	1.68612	1.06026e-12	2.9667e-12
PDE9A	1.21528	3.31005	1.44556	6.08334e-12	1.6106e-11
S100A1	2.09259	6.01754	1.52389	5.04617e-05	7.63694e-05
FLVCR1	1.67535	3.69065	1.13941	2.5702e-28	3.97119e-27
DBN1	2.98714	11.1309	1.89773	5.71096e-17	2.31125e-16
PDX1	1.1189	3.33146	1.57407	2.09055e-07	3.84122e-07
DCLRE1B	0.973196	2.10793	1.11502	3.90908e-31	9.54056e-30
MDFI	0.658998	3.03702	2.20431	4.21886e-08	8.17985e-08
GLS2	2.43323	0.718739	-1.75933	7.93101e-05	0.000118067
GPLD1	8.9055	3.54021	-1.33086	9.60629e-12	2.50779e-11
FBP1	183.189	70.9847	-1.36775	8.44419e-20	4.54883e-19
FGG	1878.5	901.067	-1.05987	4.90982e-18	2.21155e-17
LAMP5	0.141407	3.38527	4.58135	2.27655e-11	5.75343e-11
SCAMP5	2.74777	6.00151	1.12706	3.59108e-11	8.90252e-11
PTGES	1.94958	5.18856	1.41217	6.3578e-07	1.12294e-06
MGAT5	1.96134	4.39542	1.16416	1.83738e-14	5.93871e-14
ABCC1	1.34742	4.01373	1.57474	1.06432e-10	2.53549e-10
LRCOL1	4.20613	1.11993	-1.90908	8.91696e-14	2.72731e-13
PAQR5	1.20846	3.80489	1.65469	1.02328e-09	2.25535e-09
DUSP9	3.5567	22.6798	2.6728	3.95606e-14	1.24436e-13
KIF4A	1.40457	4.97104	1.82342	9.73152e-31	2.21675e-29
FOXK1	1.16782	2.50302	1.09985	6.88331e-32	1.9055e-30
PPP1R14D	0.767361	1.95225	1.34716	7.02018e-07	1.23462e-06
SYT8	0.837886	2.62386	1.64686	3.57909e-17	1.479e-16
TRIM45	0.588375	1.83584	1.64163	1.83659e-22	1.3152e-21
CHML	1.41428	3.3133	1.2282	7.34418e-22	4.91764e-21
CDKN2A	2.87117	6.01104	1.06598	3.83183e-06	6.34166e-06
ARL6IP6	1.19065	3.08417	1.37313	2.66544e-38	3.35536e-36
DNAJC9	1.7531	4.05122	1.20845	6.4195e-37	5.60371e-35
MFAP3L	2.63578	1.14861	-1.19834	3.19399e-13	9.32542e-13
PAFAH1B3	8.62948	22.2965	1.36947	7.28291e-19	3.57685e-18
CCSAP	0.986296	2.12509	1.10743	1.28608e-24	1.18218e-23
TACC3	2.84904	7.71684	1.43753	1.19841e-28	1.93411e-27
CDC25A	0.597261	1.93395	1.69512	4.77211e-30	9.62389e-29
PUS7	1.93517	4.02205	1.05547	2.07026e-32	6.14349e-31
SPINT1	2.70905	24.3507	3.1681	5.6744e-12	1.50433e-11
PGAP4	0.959369	2.94096	1.61613	1.6648e-12	4.60545e-12
NEURL3	1.00147	5.6443	2.49468	2.10535e-22	1.4969e-21
CRACR2B	1.34599	3.26115	1.27672	3.47774e-05	5.33559e-05
TIA1	3.87675	8.02995	1.05054	3.7576e-30	7.70791e-29
RBP2	0.287296	3.1738	3.4656	4.03858e-12	1.08387e-11
GNG4	1.31733	3.56809	1.43754	3.4391e-11	8.54701e-11
GLUD2	2.49498	6.98106	1.48442	6.0557e-10	1.35517e-09
CST1	11.7211	25.6904	1.13212	0.000468629	0.00065372
CAD	2.82945	6.46086	1.1912	1.33415e-35	8.30996e-34
SLC39A10	1.15724	2.32697	1.00777	1.04812e-18	5.04e-18
MCM2	4.17913	12.9476	1.63141	9.66808e-32	2.60407e-30
ADORA2BP1	2.75131	0.839279	-1.7129	4.94962e-18	2.22863e-17
PLXNA3	0.823873	2.38948	1.5362	1.90093e-25	1.95976e-24
FGFR1	0.810182	2.19286	1.4365	1.72855e-06	2.94638e-06
KPNA2	12.7441	31.2519	1.29411	1.61456e-32	4.92565e-31
NFATC2	1.11284	2.54509	1.19347	5.39982e-24	4.56048e-23
CD53	5.72509	11.7623	1.0388	4.52645e-06	7.44387e-06
CPNE1	15.6885	32.219	1.03821	1.48113e-27	2.0174e-26
TMEM132A	0.756336	5.51818	2.86709	8.83237e-17	3.50685e-16
PHF21A	1.10996	2.43787	1.13511	2.8387e-36	2.12175e-34
PRR15L	2.04627	11.4838	2.48854	3.72771e-16	1.39013e-15
ZDHHC1	0.982482	2.35541	1.26147	7.83378e-06	1.26532e-05
MIR210HG	0.954268	2.1484	1.1708	2.89237e-08	5.68351e-08
PEG3	0.624064	5.11657	3.03541	3.9665e-08	7.70555e-08
SLC6A6	0.787676	2.89278	1.87678	2.19018e-15	7.62737e-15
SLAMF7	0.962977	2.70671	1.49097	1.04693e-05	1.67248e-05
GLIS2	1.73342	4.95967	1.51662	4.30059e-15	1.46318e-14
SKP2	3.51613	9.00818	1.35724	3.92359e-27	5.03457e-26
RIDA	211.389	80.9658	-1.38452	3.28524e-31	8.13419e-30
AGRN	11.152	26.3113	1.23838	4.07631e-17	1.67406e-16
LCAT	21.3435	9.99923	-1.09391	1.10916e-09	2.43698e-09
IGHV1-18	6.56664	30.8485	2.23197	0.000221568	0.0003176
TESC	10.9147	23.8714	1.12901	4.55932e-10	1.02897e-09
ITPR3	0.443276	3.36204	2.92306	1.92705e-18	8.99868e-18
CRYGS	0.698521	2.94619	2.07648	2.2742e-10	5.26261e-10
SH3YL1	0.60093	2.25103	1.90531	1.5165e-07	2.81568e-07
SPDEF	0.433327	3.03348	2.80744	1.00412e-09	2.21538e-09
TMEM44	0.860626	2.1211	1.30135	2.26127e-27	3.00139e-26
SAMSN1	0.753489	1.60607	1.09187	1.54116e-07	2.86015e-07
TUBA1C	5.99741	13.7074	1.19254	3.03573e-25	3.04056e-24
PTBP3	4.30006	9.39669	1.1278	9.468e-39	1.34795e-36
UPK3A	5.80125	15.573	1.42461	2.81258e-13	8.2643e-13
ARHGAP11A	0.813855	2.40389	1.56253	5.46942e-30	1.08833e-28
HMGN2P15	0.819658	2.67824	1.70819	1.73509e-08	3.47687e-08
CFTR	0.288334	4.73747	4.0383	6.49981e-06	1.05771e-05
IGLV3-25	8.62334	25.6289	1.57145	0.000345793	0.000487772
AC011477.2	0.970718	2.04168	1.07263	2.4801e-11	6.24016e-11
MISP	1.54039	6.02595	1.96789	7.72636e-14	2.37714e-13
BIRC5	4.14251	11.4321	1.46452	3.94551e-24	3.39456e-23
CMTM7	1.81553	3.83097	1.07732	1.46377e-20	8.56423e-20
IGSF1	0.492203	2.88792	2.55271	1.06495e-11	2.77104e-11
UCA1	0.171178	5.6694	5.04963	4.16347e-06	6.86582e-06
CMTM4	1.09859	2.69233	1.2932	1.46662e-18	6.92157e-18
EIF5A2	0.895906	2.02085	1.17354	2.01758e-12	5.54673e-12
CASP2	1.46182	3.48529	1.25351	1.48805e-37	1.49543e-35
ELF3	9.63352	19.5523	1.02121	1.25516e-09	2.74215e-09
ZNF514	0.70455	1.52085	1.1101	3.38477e-28	5.10447e-27
APOC1	4148.34	1811.79	-1.19512	2.00261e-25	2.05749e-24
ALDH3B1	1.6541	3.87193	1.22701	4.74514e-17	1.93544e-16
RBP4	4014.16	1724.4	-1.219	7.80156e-35	3.92012e-33
ZNF266	2.07672	4.17655	1.00801	1.33008e-22	9.61116e-22
LINC02362	3.4306	1.03594	-1.72752	4.13404e-15	1.40812e-14
AKR1D1	25.7565	10.9014	-1.24043	1.19249e-07	2.23177e-07
LINC01485	37.9764	14.1614	-1.42314	1.46469e-21	9.50935e-21
MIS18A	3.20348	6.94795	1.11695	7.81909e-31	1.79135e-29
ARID3A	0.975828	5.69154	2.54412	1.08784e-26	1.31409e-25
FXYD3	0.935027	5.97937	2.67691	3.64485e-07	6.55765e-07
TTLL4	1.73111	5.75928	1.73419	1.13346e-36	9.41326e-35
NRARP	1.44202	3.16537	1.13428	9.46233e-08	1.78627e-07
PLBD1	1.68578	6.15741	1.86891	1.6648e-12	4.60545e-12
CDKN3	3.16108	8.4745	1.42271	1.67803e-24	1.51912e-23
CXCR2P1	0.704163	1.4823	1.07385	0.000194184	0.000279856
ZSCAN18	1.17724	2.47255	1.07059	2.27136e-11	5.74155e-11
HAGLR	0.616499	2.90981	2.23875	7.98454e-08	1.51712e-07
TRNP1	6.07955	20.0557	1.72198	1.0971e-13	3.32916e-13
STEAP4	1.90409	0.734829	-1.37362	1.79118e-11	4.57414e-11
ARNTL2	1.10415	2.3589	1.09518	6.19564e-08	1.18683e-07
SEL1L3	2.41149	11.1582	2.21011	4.15908e-13	1.20519e-12
PHLDA2	5.92616	12.5904	1.08715	4.17185e-08	8.09002e-08
NCAPD3	1.06214	2.29816	1.1135	1.16571e-31	3.09107e-30
CCNF	0.892641	2.39833	1.42588	6.73056e-31	1.5599e-29
BAZ2A	3.46663	7.31854	1.07802	5.20668e-39	8.08659e-37
CHEK1	0.802646	2.1285	1.407	1.99808e-32	5.95886e-31
RDH16	61.3391	15.5001	-1.98453	6.60613e-22	4.45086e-21
STK17B	1.12633	2.28157	1.01839	5.59591e-12	1.48516e-11
CHRNA4	1.84555	0.673309	-1.45471	1.37146e-06	2.3582e-06
CENPO	0.804332	2.02929	1.33511	1.24319e-34	5.92321e-33
SHCBP1	0.531261	1.80757	1.76656	5.22273e-23	3.93069e-22
C11orf80	1.04902	2.28131	1.12082	2.83198e-17	1.18171e-16
GLS	2.85166	6.24693	1.13134	3.94081e-17	1.6212e-16
SLC6A8	4.11074	9.59501	1.22289	4.04205e-10	9.17073e-10
ZNF710	1.57939	3.66859	1.21586	5.48675e-28	8.08079e-27
NUP205	2.46954	5.4523	1.14262	1.50449e-39	2.81129e-37
JARID2	1.6	3.26078	1.02715	7.99996e-34	3.15748e-32
PAG1	1.43028	2.86566	1.00257	7.18045e-09	1.48028e-08
CREB3L1	0.966655	4.15483	2.10372	3.75836e-05	5.75127e-05
MMP7	3.75982	14.0761	1.90451	6.56968e-07	1.15949e-06
FANCI	1.05469	3.02117	1.51829	4.46505e-33	1.49155e-31
PIP4P2	1.44518	3.21988	1.15576	3.18239e-11	7.93375e-11
ZDHHC2	0.878232	1.75803	1.00128	1.30251e-09	2.8409e-09
WNK2	0.306885	3.03307	3.30501	5.34202e-20	2.94567e-19
MLLT11	1.14372	2.56147	1.16324	9.5963e-06	1.53795e-05
DOT1L	1.843	3.79394	1.04164	5.29989e-34	2.19313e-32
NCEH1	1.18247	5.39292	2.18926	1.57428e-14	5.12155e-14
ANXA2P2	1.62897	3.54895	1.12343	6.44014e-13	1.83638e-12
USH1C	1.86615	5.72099	1.6162	1.69828e-11	4.35084e-11
RIC8B	1.26426	2.62639	1.05478	5.24535e-20	2.89742e-19
MTHFD2	0.859053	1.86448	1.11795	7.08733e-12	1.86896e-11
C4BPA	545.477	257.683	-1.08192	2.43163e-16	9.23464e-16
SULT1C2	1.65482	3.32815	1.00805	1.64652e-10	3.86051e-10
SERPINE2	1.78734	5.7844	1.69435	2.56765e-09	5.47647e-09
GUCA2A	0.431905	2.71481	2.65206	9.35103e-08	1.76665e-07
NMB	3.2666	7.63781	1.22537	1.66632e-13	4.9769e-13
AC004832.5	1.49515	0.60583	-1.30331	1.7139e-14	5.55051e-14
CDK4	9.35892	21.6078	1.20714	3.27601e-38	3.95735e-36
KIAA1522	9.16598	20.2757	1.14539	5.82693e-25	5.59713e-24
AC079360.1	1.82098	0.786661	-1.2109	1.46967e-14	4.79166e-14
CAPN6	0.288276	3.51267	3.60705	1.53983e-11	3.97041e-11
CNTRL	0.662332	1.67176	1.33574	3.96475e-35	2.16505e-33
IFT57	1.44742	3.38056	1.22378	4.54919e-17	1.85996e-16
LIG1	3.45335	6.98504	1.01627	3.31485e-30	6.84669e-29
GCNT3	0.675325	2.64203	1.96799	2.79473e-09	5.94396e-09
MEST	5.60103	14.0482	1.32662	5.65047e-13	1.6197e-12
ETV4	3.86671	10.6522	1.46197	8.60246e-12	2.25212e-11
NPTX2	1.62232	10.541	2.69988	9.61048e-06	1.54002e-05
AC006329.1	3.72987	1.36153	-1.4539	8.11294e-17	3.23841e-16
MSI1	1.39387	4.39686	1.65737	5.63292e-10	1.26292e-09
SMC2	1.46067	3.31192	1.18104	2.17823e-28	3.40071e-27
VIL1	5.26318	15.3225	1.54165	6.15225e-18	2.74943e-17
AC016735.1	0.860063	4.39282	2.35263	5.79526e-17	2.34298e-16
DMKN	0.673138	3.20664	2.25209	1.8143e-11	4.63023e-11
REXO5	0.938484	1.93433	1.04343	2.69933e-14	8.61525e-14
WSB1	3.26706	7.36554	1.1728	1.48059e-29	2.74945e-28
PHYHIPL	1.58202	4.1054	1.37575	3.67458e-10	8.36556e-10
CEACAM6	0.102916	4.74873	5.528	1.63975e-05	2.58057e-05
FDCSP	6.17882	19.7036	1.67306	0.000155246	0.000225753
AP003119.3	3.69227	1.82208	-1.01892	2.97539e-11	7.43474e-11
ZSWIM5	0.736125	2.19129	1.57376	6.96587e-19	3.42959e-18
IGHG4	15.7966	52.3235	1.72784	7.26902e-05	0.000108585
ACSM2A	30.1823	10.4085	-1.53595	1.05698e-27	1.47496e-26
SRD5A2	5.38548	2.35301	-1.19457	2.01218e-10	4.67346e-10
ARMCX1	1.15784	2.52989	1.12763	1.5419e-08	3.10118e-08
FBLN1	3.75036	13.8091	1.88052	6.47598e-12	1.71152e-11
PAQR8	0.889416	2.37772	1.41865	3.83666e-20	2.14806e-19
TET3	0.779321	1.87943	1.27	6.67201e-34	2.67753e-32
HTR1D	0.475561	1.99298	2.06723	7.44691e-09	1.53336e-08
PLXNA1	1.27946	3.51385	1.45752	9.26412e-35	4.52203e-33
AC026401.3	2.27491	4.82637	1.08512	4.5789e-19	2.29309e-18
TOP2A	3.61913	14.2538	1.97764	1.08007e-35	6.87048e-34
ZNF518A	1.04101	2.08464	1.00182	3.52461e-22	2.4492e-21
NNMT	193.221	61.5429	-1.65059	1.31056e-09	2.85796e-09
C19orf33	1.84961	6.2519	1.75707	6.22892e-07	1.10163e-06
PKM	10.5795	48.2303	2.18867	4.27869e-24	3.67065e-23
FAM117B	0.66342	2.04803	1.62624	2.62776e-29	4.68337e-28
MCM5	6.00152	12.3822	1.04487	1.66097e-24	1.5071e-23
SLC44A2	5.61586	11.9676	1.09156	2.56932e-06	4.31673e-06
STMN3	1.70021	4.3938	1.36976	1.00467e-05	1.60734e-05
USP1	3.84373	8.12944	1.08065	1.22529e-28	1.97483e-27
TEAD2	4.63221	12.2335	1.40106	4.30074e-19	2.16103e-18
RGS1	3.40144	8.00304	1.2344	7.07963e-11	1.708e-10
MMD	3.69096	9.5703	1.37457	1.10403e-25	1.17256e-24
CLCF1	1.57546	3.20218	1.02328	2.3438e-08	4.6468e-08
CYP4F2	39.1439	13.9437	-1.48918	4.54723e-23	3.44834e-22
IGHV4-34	2.44954	10.5064	2.10068	0.000117567	0.000172577
FMO1	0.801672	2.90549	1.85769	5.35986e-11	1.30894e-10
DEPDC1B	0.607373	3.41388	2.49076	9.59166e-39	1.34949e-36
TAF1D	3.15171	6.55198	1.0558	7.13507e-28	1.02435e-26
MYO19	1.65677	3.41559	1.04377	1.61456e-32	4.92565e-31
HK2	1.3231	3.04675	1.20335	7.48284e-09	1.53997e-08
RFC4	3.79018	8.41975	1.15151	7.1875e-29	1.19548e-27
PTK7	0.691453	3.62809	2.39151	5.0856e-16	1.8777e-15
NUMBL	0.863127	1.8226	1.07836	1.88249e-16	7.22952e-16
HORMAD2-AS1	6.21764	2.39681	-1.37525	1.92912e-07	3.55585e-07
MSI2	0.975687	2.15528	1.14338	1.18799e-25	1.25727e-24
SUV39H2	1.30298	2.79676	1.10194	1.72824e-40	4.59289e-38
IGHV1-69	2.29703	6.09442	1.40772	0.000134499	0.000196467
NBEAL2	1.35012	3.4026	1.33355	1.50707e-31	3.91805e-30
LINC00659	3.75735	1.49755	-1.32711	2.39466e-09	5.12212e-09
CDC6	1.60885	4.95407	1.62258	1.6492e-26	1.95082e-25
TNFSF4	0.712769	1.51679	1.08951	3.88066e-15	1.32521e-14
LEF1	0.914255	2.0847	1.18917	7.47475e-08	1.42251e-07
XRCC3	0.768109	1.57691	1.03772	3.16441e-25	3.15359e-24
POGLUT2	2.9568	5.94044	1.00653	3.94081e-17	1.6212e-16
AL390728.4	2.14756	6.52723	1.60377	4.88869e-25	4.73008e-24
SDSL	33.4249	16.2723	-1.03851	3.81426e-11	9.43429e-11
BX322562.1	1.30954	3.1207	1.25281	3.48525e-08	6.80491e-08
CBX6	2.06542	4.66041	1.17403	1.68871e-12	4.66728e-12
LPCAT1	4.54777	10.7293	1.23832	4.34706e-18	1.9677e-17
NFE2L3	1.06031	3.7522	1.82325	1.34918e-23	1.08287e-22
GSDME	0.750642	1.72733	1.20235	3.92604e-14	1.23557e-13
ARHGAP33	0.857542	1.79509	1.06578	2.57717e-19	1.3239e-18
H2AW	1.59501	5.25711	1.72071	6.8238e-13	1.94056e-12
TCERG1	2.04581	4.23344	1.04916	3.92975e-43	2.61088e-40
PLEKHB1	0.224614	3.93867	4.13219	9.51871e-22	6.28571e-21
PABPC1L	3.31259	7.01216	1.0819	1.09001e-19	5.80643e-19
OLFML3	2.47212	7.64433	1.62864	1.52815e-12	4.24117e-12
ZNF354A	1.20691	2.42468	1.00647	7.03333e-20	3.82325e-19
PKIB	1.57447	4.04772	1.36224	6.62078e-08	1.26503e-07
TRIP13	0.806655	3.36706	2.06147	4.80972e-34	2.01823e-32
CYP4A11	92.5888	41.8847	-1.14441	1.54025e-15	5.44162e-15
BICC1	1.40835	7.79239	2.46806	8.34826e-16	3.01622e-15
CSGALNACT1	0.92483	2.14085	1.21092	5.89426e-08	1.13055e-07
PCLAF	1.64845	4.34676	1.39883	4.43603e-23	3.36614e-22
S100A14	11.1997	45.6948	2.02857	1.37355e-08	2.77565e-08
CDR2L	0.99385	3.29153	1.72766	1.32259e-06	2.27483e-06
DCXR-DT	7.01576	2.39712	-1.5493	5.40485e-15	1.82499e-14
FGA	3047.45	1439.07	-1.08247	2.59364e-21	1.64287e-20
ZNF28	0.649193	1.97429	1.60462	1.98185e-25	2.03792e-24
PKP3	0.185634	2.89745	3.96425	2.95985e-10	6.7823e-10
DNASE1L3	6.11759	2.68813	-1.18636	1.19464e-09	2.61662e-09
DSG2	3.52068	12.4204	1.81878	4.61219e-20	2.56307e-19
FOLR1	0.336425	2.3277	2.79055	7.50792e-13	2.12665e-12
ZIC2	1.14386	3.06148	1.42032	5.81212e-13	1.66484e-12
LINC00942	0.842063	2.68707	1.67404	1.00883e-05	1.61377e-05
GSTZ1	5.38502	2.61177	-1.04393	1.92443e-14	6.21334e-14
APLP1	0.602727	2.68581	2.15578	9.86309e-05	0.000145693
SNORD6	1.1103	2.51961	1.18225	1.46583e-13	4.40007e-13
CPNE7	0.641051	1.98585	1.63125	0.0004964	0.000691169
CDK2	3.52183	7.67522	1.12388	1.37724e-33	5.0992e-32
GCC2	1.08465	2.24424	1.04899	1.54626e-28	2.45901e-27
GRB7	2.43994	7.84001	1.68401	3.29849e-25	3.26815e-24
CYP11A1	2.9119	1.08121	-1.42931	5.61053e-17	2.27214e-16
FAM217B	0.739647	1.58987	1.104	4.92235e-16	1.81911e-15
TM4SF1	23.5671	53.2594	1.17626	3.85658e-05	5.89403e-05
SOCS7	0.786728	1.74518	1.14944	3.69174e-32	1.05621e-30
NPNT	1.18249	6.88141	2.54088	3.42604e-10	7.81461e-10
KITLG	0.96746	2.00484	1.05121	3.22545e-11	8.03607e-11
AP3M2	0.907115	1.935	1.09298	2.19787e-26	2.54447e-25
GPX7	2.86318	6.70852	1.22837	6.04005e-11	1.46606e-10
CDC20	5.14276	18.994	1.88493	1.05351e-26	1.27519e-25
BCL9L	1.40555	3.61111	1.36131	6.48006e-22	4.37084e-21
VTCN1	0.231572	6.52744	4.81699	4.73887e-07	8.46612e-07
SKA3	0.848602	2.63875	1.63669	8.60867e-30	1.6605e-28
IER3	17.5236	40.1604	1.19648	6.90873e-10	1.54087e-09
DHODH	8.71744	3.89633	-1.16179	2.74756e-27	3.59498e-26
LYPD1	1.97519	4.89738	1.31002	8.99644e-15	2.98277e-14
TRIM47	7.58948	15.2129	1.00322	7.26913e-11	1.75194e-10
FOLH1B	1.31349	0.598072	-1.13502	0.00014323	0.000208813
SYK	1.02151	2.75852	1.4332	1.18728e-09	2.60193e-09
MCM4	4.58332	12.2864	1.4226	5.87655e-33	1.91492e-31
AC092868.2	0.783543	1.61574	1.04411	8.02878e-06	1.29472e-05
TPM3P9	0.994421	2.49361	1.32631	3.00438e-25	3.01168e-24
CACNG4	0.960634	3.18738	1.73031	1.94971e-12	5.36507e-12
PDLIM7	3.72205	7.46282	1.00362	2.52808e-15	8.76074e-15
C8A	112.282	40.995	-1.4536	1.19763e-26	1.43944e-25
CYP2C8	137.358	44.7157	-1.61908	6.65746e-20	3.62883e-19
HILPDA	2.30107	4.90854	1.09299	2.92344e-19	1.49216e-18
ADAMTS9	0.868005	1.84655	1.08905	3.79329e-10	8.62761e-10
MARCKS	13.3879	35.1954	1.39446	1.02008e-29	1.94254e-28
TLCD3A	1.2044	2.95862	1.29661	6.60337e-19	3.25648e-18
STC2	1.28638	3.02884	1.23545	8.5927e-06	1.38156e-05
SLC6A9	0.697569	1.80255	1.36963	2.10826e-11	5.3462e-11
MYBL2	3.96396	17.5447	2.14602	3.96206e-32	1.12815e-30
TMEM74B	1.43185	3.21709	1.16788	4.90609e-08	9.46169e-08
RASAL2	0.716259	1.55025	1.11395	4.19608e-22	2.89561e-21
PON1	123.925	54.6926	-1.18005	4.69779e-20	2.60579e-19
CPA2	0.115148	8.96667	6.28301	3.34089e-07	6.03439e-07
KRT17	0.895052	3.7714	2.07506	0.000422998	0.000592208
SCD5	0.477693	4.60241	3.26823	2.24192e-06	3.78741e-06
RACGAP1	2.0991	6.23209	1.56994	8.36873e-38	8.77909e-36
CYRIB	2.74395	6.0934	1.151	4.6648e-30	9.42337e-29
TCF3	3.89419	9.41717	1.27397	9.96383e-43	5.6426e-40
DTL	1.5136	4.11218	1.44192	9.3355e-26	9.98598e-25
ZNF292	0.760655	1.94096	1.35145	4.86346e-28	7.2072e-27
LINC02428	5.38362	1.93059	-1.47954	4.23892e-10	9.59372e-10
MAPK13	1.18442	5.56052	2.23104	1.0658e-20	6.31921e-20
SLC39A6	5.56983	11.8802	1.09286	6.94997e-24	5.78793e-23
CTSE	0.18795	4.42299	4.5566	1.16027e-11	3.01252e-11
IMPDH1	2.42417	7.09583	1.54948	2.63793e-14	8.42826e-14
ZNF92	0.896262	1.9044	1.08735	2.01668e-31	5.08807e-30
LAPTM4B	25.2783	63.7557	1.33465	6.36913e-18	2.83999e-17
B4GALNT4	0.337445	2.25539	2.74065	1.83244e-09	3.95634e-09
COL16A1	0.879295	1.94801	1.14758	4.31655e-06	7.11238e-06
CDC7	0.798229	2.23823	1.48748	1.91628e-24	1.72177e-23
NAALADL1	0.624518	3.66263	2.55207	5.40446e-09	1.1258e-08
SUPT20H	1.01297	2.03049	1.00324	8.81236e-34	3.44402e-32
BAIAP2L2	4.10879	11.0512	1.42742	6.20983e-10	1.38914e-09
CDC42BPG	0.460314	1.84071	1.99957	3.86567e-11	9.55157e-11
C12orf75	2.36482	11.5912	2.29323	2.09052e-12	5.73803e-12
NLRP6	1.51544	0.7084	-1.0971	3.74976e-08	7.29634e-08
MOGAT2	9.03278	1.9765	-2.19222	3.1893e-18	1.4591e-17
SLC27A2	62.6179	27.0123	-1.21296	3.26143e-22	2.27028e-21
RNF145	3.38189	8.28057	1.2919	2.06619e-25	2.11917e-24
QSER1	1.21829	2.62012	1.10477	2.66544e-38	3.35536e-36
PLP2	22.3696	50.5543	1.17629	3.23496e-10	7.3957e-10
NAP1L1	7.12389	16.2813	1.19248	3.13817e-36	2.31663e-34
MYO10	0.708832	2.0928	1.56192	4.49904e-05	6.84616e-05
FGFR2	5.75237	13.2836	1.20741	1.98377e-06	3.36319e-06
LRFN4	0.670461	1.67883	1.32423	8.4996e-07	1.48411e-06
SERPING1	756.827	367.105	-1.04377	1.23607e-29	2.31696e-28
WDR76	1.17009	2.69369	1.20297	6.79677e-21	4.12392e-20
DNER	0.473978	2.24149	2.24157	0.000141072	0.000205767
IGKV3D-20	2.39473	5.87211	1.29402	0.000598867	0.000828056
PMEPA1	1.8958	8.93828	2.23719	4.59592e-05	6.98825e-05
FCAMR	3.21871	1.27476	-1.33626	8.99021e-08	1.70009e-07
APOBEC3C	2.52773	5.09487	1.0112	8.91553e-06	1.43173e-05
HPD	725.924	232.232	-1.64425	6.88575e-23	5.11153e-22
ANKRD10-IT1	1.4773	3.47074	1.23228	5.60804e-16	2.05978e-15
MMP9	4.71234	16.1538	1.77736	8.23913e-11	1.97498e-10
MYRF	3.54014	10.4926	1.5675	1.42474e-24	1.30663e-23
AC021074.3	12.4657	6.16486	-1.01583	5.50142e-09	1.14504e-08
PFKFB1	10.0847	4.37938	-1.20337	6.70869e-18	2.9825e-17
CNOT6	1.77362	4.09237	1.20624	7.06538e-45	8.44949e-42
ANKRD27	1.69533	3.51121	1.0504	1.48113e-27	2.0174e-26
TRIP10	3.70488	7.8442	1.0822	1.49272e-16	5.78092e-16
LRRC1	1.25568	4.1814	1.73551	4.65038e-31	1.11899e-29
C8B	134.799	61.0207	-1.14344	6.26326e-25	5.98262e-24
TLDC2	0.696269	2.06331	1.56724	4.97031e-12	1.32501e-11
B4GALT5	7.11414	14.9973	1.07595	1.58096e-21	1.02199e-20
BMF	1.52814	6.04072	1.98294	4.49173e-31	1.08518e-29
FITM1	1.66445	0.792506	-1.07055	6.59869e-16	2.41179e-15
GMIP	1.85395	3.93606	1.08615	5.98654e-19	2.96329e-18
FAM241B	2.29531	5.11029	1.15471	1.18266e-16	4.64214e-16
SLC7A7	1.29615	3.32223	1.35791	1.71193e-10	4.00725e-10
GDAP1	0.981649	2.03233	1.04985	1.20012e-14	3.94291e-14
C15orf39	2.78152	5.69441	1.03367	1.80108e-22	1.29054e-21
AC011591.1	1.8727	0.665521	-1.49256	1.16231e-10	2.75851e-10
MPP7	0.776148	1.70826	1.13813	2.65824e-14	8.48863e-14
IGHV1-3	0.297398	2.14511	2.85058	5.93888e-05	8.9461e-05
ENPP3	0.761277	2.73922	1.84727	0.000167135	0.000242335
AKR7A3	48.0291	18.6159	-1.36737	5.12047e-23	3.86345e-22
KIFC1	2.64122	9.03383	1.77413	2.14955e-33	7.60545e-32
HIF1A	8.94862	21.3168	1.25226	8.41612e-16	3.03982e-15
RBM12B	0.762484	1.56144	1.0341	4.0007e-31	9.74426e-30
MAMLD1	0.777901	2.35997	1.60111	2.60262e-10	5.99591e-10
HDAC7	2.1516	4.77057	1.14875	9.86082e-20	5.28103e-19
SAA1	1862.24	256.549	-2.85973	7.39916e-15	2.46962e-14
SOX12	4.09364	9.26594	1.17855	3.37732e-23	2.59572e-22
ZNF468	0.934951	2.81283	1.58906	1.02595e-25	1.09352e-24
LLGL1	1.21792	2.62079	1.10558	6.8743e-29	1.14818e-27
SLC7A1	0.761215	2.49632	1.71342	3.62023e-18	1.65057e-17
AURKA	4.86027	10.0461	1.04753	9.50741e-19	4.60134e-18
CBX1	7.36291	16.1137	1.12994	2.28338e-40	5.81e-38
VANGL1	0.896636	1.81927	1.02076	3.11934e-23	2.40827e-22
NCF2	2.85551	5.94267	1.05736	8.66734e-09	1.77609e-08
CBFA2T2	1.44586	3.05238	1.078	7.89432e-39	1.13745e-36
PTTG1	5.77997	14.26	1.30284	3.38221e-21	2.12659e-20
CPVL	5.45987	11.5021	1.07495	5.36667e-07	9.54207e-07
ZNF841	0.924919	1.93248	1.06306	1.5404e-22	1.10907e-21
IQCB1	2.12428	4.38057	1.04414	8.85075e-36	5.78394e-34
NDN	2.55507	8.14619	1.67276	6.65732e-06	1.08246e-05
MCM6	5.08305	13.1284	1.36893	4.05787e-34	1.74561e-32
AC092535.5	4.18304	9.80379	1.22879	1.29334e-13	3.89793e-13
SLC27A5	68.3695	19.6175	-1.80121	1.02595e-28	1.6693e-27
SFXN3	2.10713	5.32097	1.33641	1.01798e-16	4.02048e-16
CDS1	0.93549	2.05347	1.13427	2.26493e-08	4.49194e-08
RNU6-850P	0.697776	1.79147	1.36031	3.69519e-21	2.31487e-20
ABCC10	1.30343	2.74584	1.07493	2.7658e-33	9.64321e-32
PPP1R13L	2.24312	4.7029	1.06805	3.33979e-10	7.62516e-10
FCGBP	0.512511	2.1933	2.09745	1.36272e-13	4.09776e-13
AGO2	1.25509	2.84957	1.18295	4.54058e-35	2.42415e-33
MTF2	1.24438	2.87308	1.20716	2.70004e-38	3.36352e-36
C1orf116	0.292378	2.66315	3.18723	6.17619e-15	2.07358e-14
AC018467.1	1.34174	0.632817	-1.08424	4.57329e-15	1.55331e-14
FEN1	8.99566	18.3211	1.0262	8.16566e-24	6.744e-23
ITGA5	10.8374	21.8259	1.01003	5.66313e-17	2.29266e-16
STX3	2.44877	6.24603	1.35088	8.24256e-22	5.47627e-21
CDCA5	2.12801	5.69185	1.41939	3.38477e-28	5.10447e-27
H19	80.4996	470.364	2.54672	1.17007e-07	2.19186e-07
IL2RG	4.94857	12.9775	1.39092	6.65732e-06	1.08246e-05
QSOX1	7.68907	19.0225	1.30682	1.5067e-08	3.03294e-08
C11orf49	0.995315	2.25497	1.17988	8.98693e-22	5.94111e-21
GPD2	1.15198	2.74204	1.25114	1.99808e-32	5.95886e-31
PRKDC	4.7858	10.1018	1.07778	3.6556e-28	5.4715e-27
GTSE1	0.614461	2.68258	2.12623	1.02715e-37	1.06814e-35
ADD3	2.70435	6.76629	1.32308	7.6409e-31	1.75726e-29
LINC01831	4.56088	2.26592	-1.00921	0.000691013	0.000950302
CCL20	21.5262	46.24	1.10305	4.88774e-10	1.1006e-09
RAC2	4.81083	10.937	1.18486	2.28838e-07	4.19221e-07
CDC45	1.42783	3.80736	1.41497	6.80168e-25	6.47106e-24
CDCA8	2.02626	6.83323	1.75375	1.32552e-31	3.46869e-30
STK39	1.85748	5.00979	1.4314	2.94046e-15	1.01165e-14
FAM3B	3.44014	9.91506	1.52715	2.10405e-12	5.77383e-12
SFRP5	0.931931	17.6739	4.24526	2.33496e-07	4.27557e-07
ARL14	0.530972	3.94014	2.89154	2.03201e-05	3.17491e-05
LMNB2	2.98265	9.52792	1.67557	1.02732e-41	3.61346e-39
SPC25	1.09625	3.18592	1.53914	4.93769e-30	9.90769e-29
PITX1	0.756232	3.28334	2.11826	2.58498e-16	9.80144e-16
NEK2	1.53388	5.13525	1.74325	2.73283e-33	9.5561e-32
RAP1GAP	6.2535	15.3619	1.29662	1.83822e-10	4.28107e-10
ECT2	1.35044	4.88328	1.85442	2.66614e-36	2.01799e-34
XXYLT1	0.830709	1.86386	1.16588	9.7355e-26	1.03952e-24
AKR1C6P	5.88547	2.76215	-1.09137	4.06837e-15	1.38682e-14
TYMS	5.57169	13.9003	1.31893	4.28492e-23	3.25768e-22
VEZF1	3.64139	7.32353	1.00805	2.00895e-35	1.19527e-33
SINHCAF	1.06203	4.24668	1.9995	9.0396e-35	4.43051e-33
LAMA5	3.21734	8.32083	1.37086	1.59883e-14	5.19858e-14
GPC4	1.31702	2.72498	1.04897	0.000119397	0.000175177
FGFR3	9.3139	30.0774	1.69122	1.75587e-21	1.12956e-20
KRT23	9.30201	21.58	1.21408	4.17973e-05	6.36919e-05
NAA40	1.53931	3.68712	1.26022	3.97396e-38	4.61404e-36
IGKV1OR2-108	0.470859	2.36504	2.32849	6.81201e-05	0.000102035
EMID1	1.99879	4.17868	1.06392	0.000155599	0.000226184
BHLHE41	0.64542	1.96553	1.60661	4.01573e-07	7.20326e-07
ATAT1	1.31615	2.635	1.00149	1.07123e-23	8.75061e-23
NPM3	10.553	22.4182	1.08702	1.00764e-20	5.9982e-20
INAVA	0.579849	2.97252	2.35794	4.12543e-17	1.69249e-16
CARMIL1	0.841477	2.23088	1.40662	3.13803e-16	1.17864e-15
CEP55	0.578817	2.8665	2.30811	1.38479e-35	8.58069e-34
MYOF	1.34254	3.14815	1.22954	3.05814e-06	5.10002e-06
SLC10A3	4.38527	9.05556	1.04614	3.10584e-21	1.959e-20
CRABP2	0.733871	3.0997	2.07853	0.000159359	0.000231396
ZSWIM4	0.938126	2.20558	1.23331	6.12975e-15	2.05857e-14
JAK3	0.86361	1.78645	1.04865	1.81585e-06	3.0877e-06
IGF2BP2	1.5888	7.75353	2.28692	2.17099e-29	3.93378e-28
IKBKE	1.12845	3.37059	1.57866	2.10968e-25	2.15823e-24
SCTR	0.406537	6.7689	4.05746	3.01161e-07	5.46275e-07
RCC2	7.53001	20.0855	1.41543	5.41409e-39	8.30091e-37
FCMR	0.926336	2.16523	1.22491	5.53801e-05	8.3591e-05
SNRPN	10.8822	26.7427	1.29718	5.40524e-15	1.82499e-14
B3GNT9	0.787861	1.80153	1.19321	3.83624e-12	1.03235e-11
TRIM31	2.20763	4.68228	1.08471	3.56466e-08	6.95315e-08
PLK1	1.31223	4.99082	1.92726	1.09146e-32	3.45312e-31
ELF4	0.711597	2.88236	2.01812	6.53661e-20	3.56621e-19
DBF4	0.857264	2.09075	1.28621	9.88355e-40	2.00334e-37
TAT	220.78	45.2419	-2.28688	6.32616e-28	9.19254e-27
CSPP1	1.22328	3.28683	1.42594	7.77448e-30	1.50689e-28
MRC2	1.69364	4.41748	1.3831	7.27019e-05	0.000108585
NPM1P27	1.22833	2.83853	1.20845	9.34956e-21	5.59616e-20
TC2N	1.26136	3.23572	1.35911	5.56142e-05	8.39124e-05
ZNF211	0.978985	1.97687	1.01386	4.91709e-28	7.27766e-27
ZNF600	0.68502	1.59426	1.21866	2.62486e-25	2.64901e-24
MATN3	0.300301	3.08068	3.35877	9.80128e-14	2.98564e-13
KIRREL1	1.04904	2.12406	1.01775	2.0834e-06	3.5266e-06
CYP2C9	146.695	71.3934	-1.03895	3.97318e-12	1.06704e-11
RAB3IP	1.04552	2.2032	1.07538	5.93337e-19	2.93818e-18
TMEM201	1.06796	2.53843	1.24907	6.64492e-36	4.54095e-34
GPD1	23.6478	8.70452	-1.44187	2.4684e-15	8.56136e-15
FBLL1	0.809849	1.75522	1.11592	5.63033e-07	9.98712e-07
PHETA2	1.18829	2.72973	1.19987	0.000239763	0.000342653
PIGZ	1.19828	2.55386	1.09171	9.58614e-13	2.69109e-12
RASSF3	5.071	10.9832	1.11496	4.66722e-22	3.19492e-21
LRIG3	1.61066	4.25429	1.40127	4.23104e-27	5.41166e-26
SUSD1	0.853778	1.9575	1.19708	1.46172e-23	1.16849e-22
CALHM6	2.65263	5.60213	1.07855	0.000370875	0.000521677
ESPL1	0.854559	2.14717	1.32919	5.79555e-24	4.87405e-23
TUBB2B	0.88595	2.12692	1.26347	3.96202e-06	6.54626e-06
AC136601.2	2.13255	0.568108	-1.90834	3.23719e-16	1.21397e-15
ZBED6CL	5.31388	10.8788	1.03368	3.16391e-16	1.18761e-15
NXPH4	1.58169	5.86804	1.89141	1.84313e-08	3.68411e-08
PAPLN	1.19959	3.72575	1.63499	1.94714e-12	5.35923e-12
ADGRG1	1.93262	5.85458	1.59901	7.11323e-08	1.35587e-07
BACE2	1.99419	8.83699	2.14775	5.65012e-07	1.00193e-06
VPS37B	1.58026	3.17754	1.00775	3.74586e-17	1.54259e-16
GBA3	11.8905	4.77664	-1.31574	7.42816e-15	2.47861e-14
SDS	239.155	46.0218	-2.37756	2.37223e-16	9.02052e-16
ZDHHC23	0.870169	1.74899	1.00715	1.53815e-14	5.00539e-14
LINC00844	29.843	8.30459	-1.84541	3.77876e-15	1.29263e-14
ITM2C	14.6299	34.1903	1.22467	5.82804e-22	3.95335e-21
RAB11FIP1	1.01595	2.84222	1.48418	5.54505e-10	1.24485e-09
CCNB2	2.19136	6.93507	1.66208	1.72788e-30	3.73667e-29
JRKL	1.25979	2.66709	1.08208	2.00719e-27	2.67901e-26
UGT2B10	122.951	46.7279	-1.39572	5.03352e-17	2.04539e-16
TMED3	1.16109	3.27776	1.49723	1.21832e-18	5.80935e-18
DNMT3A	1.38914	3.49272	1.33016	3.17214e-39	5.74782e-37
APCDD1	1.51618	4.98824	1.71809	7.86318e-12	2.06491e-11
AC004862.1	2.20012	0.895137	-1.2974	4.77245e-11	1.17146e-10
ATAD2	4.84842	10.6539	1.13579	4.54671e-24	3.87833e-23
GNMT	88.3411	40.0268	-1.14212	2.90202e-10	6.65745e-10
CD7	2.00984	7.99857	1.99266	1.59539e-05	2.5134e-05
ASNS	1.44958	4.34071	1.58229	1.238e-14	4.05955e-14
RRM2	4.02133	9.90898	1.30106	2.05814e-24	1.84232e-23
VSIG1	0.481659	2.16734	2.16984	4.93456e-05	7.4775e-05
PRKCI	1.97897	4.14393	1.06625	6.72981e-38	7.31653e-36
LFNG	1.2921	2.78985	1.11047	1.25198e-06	2.15679e-06
IGLV3-27	2.62777	7.31866	1.47774	0.000231763	0.000331577
POLA1	1.00694	2.36349	1.23094	5.90201e-36	4.07989e-34
KDF1	1.80234	3.80131	1.07662	5.01846e-07	8.94184e-07
SULF1	1.414	3.33292	1.23701	9.19979e-05	0.000136197
LMNB1	4.04989	12.0328	1.57102	5.0489e-34	2.09652e-32
SCMH1	2.7074	5.54029	1.03305	3.36233e-31	8.27368e-30
COL5A2	4.87713	11.4211	1.22759	5.98895e-13	1.71303e-12
RAP2A	4.59632	9.39463	1.03136	1.7727e-21	1.13916e-20
SLC25A47	76.2061	25.0383	-1.60577	5.1872e-08	9.98129e-08
RPLP0P6	2.96253	6.3885	1.10865	2.34175e-12	6.40114e-12
LAMA5-AS1	7.9584	2.1083	-1.9164	2.20382e-21	1.40412e-20
HIC2	0.568683	1.8552	1.70588	8.50272e-33	2.71883e-31
PTPRS	1.1303	2.55077	1.17422	0.000297508	0.000422101
JAG1	2.79839	7.61994	1.44518	1.67591e-09	3.62821e-09
PHIP	1.16841	2.58278	1.14438	2.4795e-35	1.43248e-33
HES4	2.51213	5.2496	1.0633	6.89987e-07	1.21436e-06
CBX2	0.572316	1.8226	1.67111	6.16557e-13	1.76229e-12
TMC4	1.90325	14.469	2.92643	0.000147738	0.000215254
SEPTIN5	0.960026	2.30748	1.26518	1.25526e-13	3.78794e-13
MSH2	2.61862	5.98943	1.19361	6.15328e-40	1.36272e-37
SNORD100	1.17919	2.63114	1.15789	4.62182e-13	1.3354e-12
LCOR	0.984479	2.00859	1.02875	3.13112e-30	6.48961e-29
CHTF18	1.29245	2.88148	1.1567	4.37064e-23	3.32074e-22
NECAB2	9.68959	4.3854	-1.14373	5.2891e-11	1.29218e-10
VHL	3.77608	7.79658	1.04595	7.70634e-35	3.88861e-33
HMGA1	22.6148	64.4169	1.51017	1.03077e-30	2.33024e-29
PSPH	5.90036	13.9087	1.23711	1.8739e-26	2.19275e-25
POLD1	3.11314	7.22984	1.21559	3.58279e-37	3.27073e-35
PLPP2	1.95764	6.89056	1.81551	1.28629e-10	3.04126e-10
UGT1A3	2.63252	1.30979	-1.00711	1.59963e-06	2.73325e-06
DDR1	2.07983	10.1997	2.29399	5.18583e-24	4.39839e-23
MCM8	0.692141	1.95514	1.49813	2.05934e-35	1.21318e-33
HAUS6	1.00366	2.22836	1.15072	5.40467e-31	1.27989e-29
ORM2	1084.45	529.422	-1.03447	7.27385e-16	2.64884e-15
HNF1B	2.12563	7.34217	1.78832	1.17247e-12	3.27224e-12
B3GNT3	3.71613	13.9783	1.91131	5.39302e-07	9.58708e-07
RAVER2	0.689029	1.96536	1.51216	1.1166e-15	3.98847e-15
RFWD3	1.66027	3.48338	1.06907	6.20436e-34	2.50669e-32
SERPINH1	15.1475	33.7494	1.15578	6.07166e-21	3.70275e-20
LIF	0.996666	3.3138	1.73331	4.20816e-07	7.53713e-07
SLC13A5	34.503	16.6653	-1.04987	8.45152e-15	2.80911e-14
UBE2C	6.4143	24.6224	1.94061	6.86397e-27	8.4191e-26
SLC45A4	0.74448	2.27458	1.61129	7.499e-13	2.12463e-12
CKS2	20.0527	47.2143	1.23543	4.66391e-21	2.88694e-20
KIF23	0.543215	2.20426	2.0207	2.8387e-36	2.12175e-34
SMARCD3	1.14214	2.83316	1.31067	5.59813e-06	9.14465e-06
GPD1L	1.2627	2.90945	1.20424	4.74208e-18	2.14164e-17
LGALS2	2.73642	5.73197	1.06674	1.07612e-08	2.19201e-08
SPATS2	1.69692	4.23045	1.31789	5.53535e-43	3.48406e-40
AFM	77.7733	35.6824	-1.12406	1.02179e-15	3.66625e-15
AC021146.9	13.5541	5.1751	-1.38907	9.62064e-14	2.93312e-13
CRHBP	1.68966	0.665612	-1.34398	0.000363939	0.000512523
IGHV3-43	0.965095	5.00553	2.37478	0.000172364	0.000249733
PM20D2	1.7315	4.01231	1.21241	4.116e-30	8.3713e-29
MIR4664	4.08177	8.21989	1.00992	7.10061e-09	1.46483e-08
SAA2	228.863	23.9293	-3.25764	2.49581e-12	6.80826e-12
DCAF16	1.73455	4.5862	1.40274	1.51332e-40	4.3221e-38
LDB1	5.20739	10.6928	1.03801	7.04668e-32	1.94622e-30
MIB1	2.55876	5.22945	1.03121	5.36147e-27	6.66505e-26
FGD6	0.782179	2.29156	1.55076	1.57082e-22	1.13029e-21
ILF3	9.3464	18.8894	1.01509	2.38798e-48	1.42789e-44
SEC14L2	33.6544	11.2003	-1.58726	3.16097e-20	1.78902e-19
ASF1B	2.49133	7.70145	1.62821	1.42062e-26	1.69383e-25
EPHB6	0.800346	2.67039	1.73835	4.09532e-05	6.24455e-05
IGSF3	1.24092	4.14446	1.73977	7.17093e-15	2.39612e-14
ADH4	313.027	98.1611	-1.67306	8.58462e-15	2.85097e-14
CAPG	8.89489	20.0594	1.17323	2.91559e-12	7.92265e-12
HP	1841.9	409.59	-2.16894	1.53061e-34	7.04022e-33
ZBTB34	0.705702	1.68071	1.25194	7.90306e-40	1.68773e-37
PNMA3	0.82071	3.20945	1.96738	4.61551e-05	7.01361e-05
H2AX	11.9288	27.3488	1.19703	5.25143e-28	7.75331e-27
NECTIN1	1.70716	3.6287	1.08785	1.09998e-19	5.85171e-19
NCAPG	1.1294	3.9581	1.80925	2.47191e-32	7.22777e-31
BLMH	3.50051	7.78713	1.15353	7.63678e-20	4.13999e-19
PRC1	2.06455	6.38044	1.62783	1.26581e-33	4.7603e-32
CYP1A2	34.2265	10.7055	-1.67676	6.42983e-09	1.33035e-08
ENTPD2	1.02991	3.42847	1.73505	4.01683e-14	1.26248e-13
ANG	364.507	141.039	-1.36985	8.0613e-23	5.93262e-22
LOXL4	5.93837	12.7074	1.09753	2.73649e-06	4.58407e-06
UBE2Q2	3.22977	6.91596	1.0985	1.27297e-24	1.17465e-23
KIF18B	0.685889	2.95287	2.10607	3.42583e-36	2.49814e-34
BAMBI	10.471	26.8966	1.36103	7.4423e-18	3.29395e-17
DSC2	0.713328	1.79678	1.33278	4.0922e-20	2.28578e-19
MUC1	0.755976	4.1418	2.45384	4.91939e-05	7.4564e-05
IFT52	3.31745	6.93945	1.06475	2.22035e-29	4.005e-28
CKAP2L	0.559623	1.81593	1.69818	1.69342e-31	4.37401e-30
CHD3	2.07061	5.50578	1.41089	2.27704e-18	1.05711e-17
SLC9A1	1.26926	2.55467	1.00915	3.4628e-13	1.00832e-12
GLIPR1	1.22741	2.51905	1.03727	5.29072e-06	8.66024e-06
ADAP1	0.429302	1.9239	2.16397	1.73126e-11	4.42774e-11
NCAPH	0.979159	3.68237	1.91102	5.04896e-36	3.51049e-34
ANKRD52	2.5598	6.01815	1.23329	2.34978e-42	1.00361e-39
ACSS1	1.56052	3.4087	1.1272	1.06026e-12	2.9667e-12
ENC1	3.09824	6.84411	1.14341	6.31699e-17	2.54531e-16
SH3BP1	0.740303	2.43535	1.71794	3.19632e-27	4.14585e-26
P3H4	2.64972	6.2474	1.23742	7.00526e-18	3.10857e-17
ARMCX2	0.702179	1.63666	1.22084	0.00025806	0.000367791
CENPA	0.933955	3.19471	1.77426	3.6556e-28	5.4715e-27
CYBB	2.70175	6.48563	1.26335	1.27913e-05	2.03149e-05
APOC1P1	82.1185	28.0312	-1.55067	3.09358e-10	7.0806e-10
AGXT	313.316	152.056	-1.04301	1.04149e-19	5.55788e-19
IGHV4-59	6.39824	29.2407	2.19223	0.000121189	0.00017772
ITIH5	0.460699	5.10193	3.46915	3.04343e-06	5.0762e-06
BCORL1	1.10951	2.79057	1.33064	5.50024e-29	9.29059e-28
DYRK2	1.28598	2.81763	1.13161	5.20168e-29	8.86138e-28
BAK1	5.36332	10.7271	1.00007	1.82141e-23	1.44158e-22
KHDC4	3.49414	7.58083	1.11742	8.30318e-32	2.28271e-30
DMPK	1.70244	3.58417	1.07404	3.53118e-20	1.98726e-19
ARG1	209.186	101.267	-1.04662	2.07573e-12	5.69873e-12
GPC3	158.708	446.876	1.4935	1.74551e-10	4.07945e-10
KCNQ1	1.277	4.64003	1.86137	2.85828e-06	4.78006e-06
TMEM82	12.6897	5.97415	-1.08685	6.22999e-08	1.19284e-07
OSBPL3	0.716332	1.95167	1.44601	2.8055e-26	3.21062e-25
RHBDF2	2.40355	5.33644	1.15071	1.96398e-17	8.32289e-17
HSD11B1	262.196	86.513	-1.59966	7.3331e-16	2.66798e-15
BBOX1	7.38077	2.70976	-1.4456	1.24571e-06	2.14691e-06
ELOVL7	1.02446	4.69123	2.19511	3.53978e-13	1.03001e-12
AC020978.4	2.59916	1.21683	-1.09492	4.09439e-05	6.24455e-05
HSD17B13	73.8468	20.2656	-1.8655	1.27377e-10	3.01285e-10
CHKA	7.97205	17.0919	1.10029	4.59465e-25	4.4564e-24
ABHD17C	1.90741	4.27495	1.1643	2.49249e-16	9.46277e-16
DSCC1	1.0482	2.49504	1.25115	3.4222e-28	5.14794e-27
HGFAC	34.4448	14.2683	-1.27148	8.39664e-06	1.35167e-05
SLC29A4	2.13398	8.96642	2.07098	1.89806e-17	8.06069e-17
PBK	1.65873	5.2631	1.66583	1.61444e-26	1.91159e-25
ASPG	5.71243	2.49174	-1.19695	8.24351e-07	1.44133e-06
UNC13D	0.673348	2.55713	1.9251	4.49312e-09	9.42357e-09
ABCC4	1.25534	2.67691	1.0925	1.437e-07	2.67305e-07
FBXL19	1.49656	3.16813	1.08199	8.67432e-26	9.3456e-25
MAD2L1	0.953365	2.52875	1.40732	2.54722e-27	3.35117e-26
FLNC	1.88519	4.19228	1.15303	9.03956e-06	1.45048e-05
TMEM51	1.74058	7.07661	2.02349	7.48687e-22	5.00758e-21
CYTIP	0.959121	1.9313	1.00979	4.70137e-06	7.72622e-06
UAP1L1	1.09928	3.23943	1.55919	1.54325e-10	3.62516e-10
CENPF	1.10343	4.29195	1.95963	7.43413e-36	5.02287e-34
PKMYT1	0.831852	2.14453	1.36626	1.94734e-22	1.39034e-21
SMIM6	1.84607	4.43858	1.26564	6.06181e-05	9.12437e-05
CLSTN1	6.6111	18.158	1.45764	1.33892e-28	2.14927e-27
IGHV3-21	3.81197	17.1661	2.17096	0.000280372	0.00039831
A1BG	27.6773	13.5174	-1.03389	2.55818e-14	8.18003e-14
REEP4	4.74514	10.0987	1.08965	2.96208e-21	1.87129e-20
OPRPN	7.43231	0.784357	-3.24423	1.43138e-05	2.26456e-05
KIF2C	1.465	5.79776	1.98459	1.25319e-30	2.79607e-29
PRSS2	0.4854	19.404	5.32104	3.64627e-05	5.58551e-05
ZBED4	1.54488	3.2606	1.07765	1.8251e-37	1.7745e-35
CXCL8	5.41279	12.5173	1.20948	6.68844e-06	1.08693e-05
SNORD99	1.51372	3.19538	1.07789	1.07236e-08	2.1851e-08
RABL6	2.34293	4.75502	1.02114	6.9433e-25	6.59007e-24
HOOK3	1.34142	2.7282	1.02418	6.94493e-18	3.08408e-17
FXYD1	11.3341	5.02979	-1.1721	1.12429e-06	1.94522e-06
LINC02158	8.45238	0.462898	-4.19059	8.17012e-06	1.3168e-05
SLC1A7	0.996312	3.79765	1.93044	0.000548386	0.000760188
AL627309.7	0.777403	1.55943	1.00428	1.1313e-08	2.30206e-08
ATP11A	2.17924	4.70136	1.10926	1.43171e-19	7.503e-19
UROC1	15.2005	7.03095	-1.11233	4.92983e-05	7.47128e-05
TNNC1	1.30643	4.63362	1.82651	2.64522e-06	4.43864e-06
PAQR4	1.73069	4.19269	1.27653	1.18276e-16	4.64214e-16
TPX2	4.8425	15.9219	1.71719	4.95456e-32	1.38762e-30
LRRC8B	0.759144	1.7465	1.20202	8.98127e-17	3.5636e-16
CHST1	0.882367	2.12666	1.26914	4.50197e-10	1.01621e-09
MASP2	53.7294	22.3938	-1.26261	2.29128e-23	1.79446e-22
SYT13	0.412061	4.19743	3.34858	1.18841e-08	2.41498e-08
GSTP1	16.1698	35.0353	1.11551	0.000375096	0.000527304
CYP2B7P	24.5874	11.0033	-1.15999	8.40344e-11	2.01316e-10
UGT2B15	150.523	70.2479	-1.09946	2.17277e-15	7.57336e-15
SEMA6A	0.858965	3.21285	1.90318	4.05653e-08	7.87149e-08
ANKRD13D	1.68651	3.4312	1.02467	1.04993e-23	8.58835e-23
FABP5	2.01317	5.90431	1.5523	2.0033e-12	5.50872e-12
AC112206.2	1.71114	0.401845	-2.09024	1.20859e-15	4.30935e-15
DLGAP5	0.922654	3.38319	1.87452	7.82287e-33	2.52166e-31
HPX	752.515	271.043	-1.4732	5.78899e-30	1.1481e-28
SGPP2	0.319945	2.57329	3.00772	1.80754e-13	5.38928e-13
NRM	4.48672	11.5517	1.36437	5.79997e-22	3.94101e-21
LAMB1	6.51937	17.514	1.4257	9.20928e-17	3.65044e-16
RHCG	1.51153	0.665087	-1.1844	4.80608e-05	7.29113e-05
IGSF23	16.314	5.90157	-1.46694	1.05743e-18	5.08076e-18
VRK2	1.47906	3.02109	1.03039	5.78899e-30	1.1481e-28
IL18	1.36414	3.69589	1.43793	0.000300942	0.00042662
AVIL	0.767314	2.52465	1.71819	2.90282e-07	5.27181e-07
KLF5	1.49668	5.15529	1.78429	2.6874e-10	6.18169e-10
CNDP1	1.50513	0.237051	-2.66661	2.75331e-07	5.0117e-07
CLIC1	67.9436	148.35	1.1266	3.13385e-28	4.76816e-27
FZD7	0.572827	2.02523	1.82191	7.88328e-14	2.4248e-13
XDH	12.0119	5.6929	-1.07723	1.01504e-11	2.6452e-11
KCNJ11	0.686485	1.67847	1.28985	7.33722e-12	1.93145e-11
ALDOB	1859.55	679.144	-1.45317	6.42411e-21	3.90574e-20
NDRG1	15.1489	41.8408	1.4657	3.44685e-21	2.1661e-20
APOA5	147.975	53.7728	-1.46041	1.69884e-20	9.87673e-20
FOXQ1	2.26945	7.28146	1.68188	3.42446e-16	1.28139e-15
PRKCD	4.14562	9.68346	1.22394	9.47496e-34	3.66703e-32
LINC00342	0.752002	1.7152	1.18957	2.14862e-16	8.2225e-16
LBR	11.4378	23.8777	1.06186	2.60526e-35	1.48363e-33
ANLN	0.988892	4.36477	2.14202	7.36201e-38	7.93174e-36
ENPP7	7.96775	3.86084	-1.04526	2.28793e-09	4.90263e-09
IGHG1	125.164	382.846	1.61294	0.000460896	0.000643081
AGXT2	11.4038	5.60772	-1.02403	3.18226e-13	9.29572e-13
TROAP	1.33874	4.53752	1.76102	7.02057e-30	1.36741e-28
NBL1	1.5436	3.31713	1.10363	0.0006032	0.000833758
TSPAN7	2.65231	6.1899	1.22267	4.11492e-12	1.10362e-11
CYP4A22	25.9614	10.3493	-1.32683	9.23657e-16	3.32511e-15
POGK	4.01684	8.64831	1.10636	7.91658e-33	2.54501e-31
MACIR	0.713484	1.81391	1.34615	8.1284e-10	1.80281e-09
RBMS2	0.850931	1.70795	1.00515	2.43918e-08	4.8247e-08
NDC80	1.37119	4.0823	1.57395	4.37001e-27	5.57153e-26
FXYD2	1.6758	8.81608	2.39528	3.8659e-14	1.21792e-13
ARID5B	1.40476	2.82602	1.00845	2.40008e-18	1.11078e-17
AP001783.1	13.0516	2.08018	-2.64944	1.27521e-21	8.32437e-21
SULT1B1	3.28783	1.57146	-1.06503	1.15121e-10	2.7327e-10
PTPRC	1.38171	3.31751	1.26365	2.1585e-07	3.96094e-07
DLG3	0.50823	1.91271	1.91206	1.97421e-15	6.90945e-15
BICDL1	1.77324	3.81491	1.10526	1.9609e-10	4.5579e-10
FSCN1	6.32706	17.0347	1.42887	1.51348e-10	3.55733e-10
KNTC1	0.672582	2.13088	1.66366	5.11091e-37	4.5613e-35
TDG	1.63524	3.35524	1.03691	1.26856e-39	2.52845e-37
CKAP4	23.7987	51.2156	1.1057	1.70817e-28	2.69143e-27
MAFG-DT	0.994688	2.19086	1.13918	1.21027e-15	4.31277e-15
MELK	1.36686	4.3873	1.68247	4.88187e-30	9.81216e-29
ADH1B	276.325	132.608	-1.0592	2.55746e-17	1.07352e-16
CENPW	5.44848	13.2094	1.27764	2.44998e-21	1.55516e-20
CAPS	2.12402	4.98059	1.22952	1.33434e-08	2.70006e-08
AL137798.1	2.48028	1.03467	-1.26133	2.88308e-06	4.81951e-06
KIF20A	1.39267	5.40714	1.95701	7.52737e-36	5.05729e-34
NUP107	2.05466	4.30391	1.06675	2.61951e-42	1.04423e-39
IL27	5.34707	2.66439	-1.00494	2.68423e-16	1.01617e-15
FGB	2828.52	1351.66	-1.06532	1.89806e-17	8.06069e-17
FUT4	0.573956	2.11916	1.88448	3.29391e-14	1.04322e-13
RTP3	29.2593	12.269	-1.25388	2.3993e-17	1.01068e-16
NCAPD2	2.76082	8.59584	1.63854	1.99611e-42	8.8413e-40
CXCL1	5.42179	14.0682	1.3756	0.000307917	0.000436302
EZH2	1.77103	4.75771	1.42567	1.30557e-34	6.14698e-33
RNF24	0.759079	1.77072	1.22201	3.51413e-23	2.69222e-22
PYCR1	4.18747	14.3473	1.77663	8.28095e-16	2.9928e-15
MAPRE1	12.3046	27.9344	1.18284	8.26692e-37	7.06172e-35
ACSM5	26.8063	10.2162	-1.39171	5.57402e-19	2.76941e-18
RECQL4	3.55503	8.10991	1.18982	1.63178e-23	1.29923e-22
OGDHL	18.76	8.13018	-1.2063	7.50689e-18	3.32131e-17
PGC	42.651	102.727	1.26817	5.00491e-11	1.22526e-10
AC007423.1	4.05269	1.41592	-1.51714	0.000116673	0.000171328
CEP170	0.705035	1.57818	1.1625	1.27686e-26	1.53313e-25
SRC	3.13331	8.86586	1.50057	7.9449e-29	1.31963e-27
SNORA73B	0.777668	1.68356	1.11429	3.29804e-12	8.9153e-12
FKBP10	3.82582	15.3151	2.00111	3.92221e-08	7.62695e-08
C20orf194	0.761534	1.62638	1.09469	1.09998e-19	5.85171e-19
ZNF83	1.10443	3.10032	1.48911	6.20577e-18	2.77128e-17
DKK1	1.43201	21.017	3.87544	3.95607e-16	1.47339e-15
CRMP1	0.61129	1.8139	1.56917	6.59869e-16	2.41179e-15
TMEM243	1.06187	2.13135	1.00515	6.25579e-13	1.78679e-12
NOP56	9.40877	19.2661	1.03399	7.02754e-33	2.27141e-31
CMTM3	3.72819	7.97655	1.09729	2.06265e-14	6.6417e-14
AC068987.3	0.937677	2.65473	1.5014	2.02418e-11	5.14062e-11
SFI1	0.839405	2.06514	1.2988	4.02334e-30	8.19678e-29
MCM7	14.4297	30.4546	1.07762	1.30784e-29	2.4362e-28
EPS8L3	3.31502	9.58547	1.53183	6.32027e-15	2.12008e-14
GPT	49.8866	20.6482	-1.27264	3.82772e-19	1.93391e-18
TGFB1	8.02059	19.8153	1.30483	1.72804e-09	3.73565e-09
PLAU	2.27011	6.67286	1.55554	2.71061e-07	4.93847e-07
DCDC2	2.86209	15.9805	2.48117	4.14688e-11	1.02253e-10
EPB41L2	1.98877	4.46659	1.1673	7.37757e-23	5.4563e-22
B3GNT7	0.530451	2.3826	2.16724	5.89426e-08	1.13055e-07
ADH1C	318.384	103.464	-1.62164	8.29136e-20	4.46852e-19
ACTL6A	4.62781	10.1302	1.13027	1.56668e-44	1.70327e-41
LPA	4.56293	2.00045	-1.18963	2.76594e-10	6.35745e-10
BSPRY	0.894917	3.12373	1.80344	1.72504e-07	3.19e-07
MIR647	2.64819	5.30597	1.00261	1.04994e-15	3.76499e-15
AC008735.2	1.01828	2.36628	1.21649	3.16041e-20	1.78902e-19
SCUBE1	2.21651	1.04696	-1.08208	1.25197e-06	2.15679e-06
ZNF703	3.55796	7.89059	1.14908	5.50664e-07	9.77786e-07
KCTD17	2.65925	8.63394	1.699	5.4917e-20	3.02512e-19
ATP1A1	46.6551	115.723	1.31057	8.40537e-26	9.064e-25
CFHR5	72.8928	30.7234	-1.24644	3.91784e-12	1.05265e-11
PLAGL2	1.1741	3.24428	1.46634	4.68359e-41	1.47397e-38
ADAM8	0.90303	2.14575	1.24864	1.37274e-12	3.81249e-12
PROZ	15.3383	6.78126	-1.17751	5.32134e-14	1.65811e-13
ABHD3	6.09856	13.5578	1.15258	1.51435e-29	2.80778e-28
ARMCX6	0.932019	2.13065	1.19286	6.20229e-11	1.50331e-10
TMEM164	1.84325	3.70704	1.00802	2.48541e-20	1.42693e-19
OLFML2B	2.19435	5.62539	1.35816	7.82954e-10	1.73911e-09
HSPA6	2.37711	7.3407	1.62671	4.68483e-09	9.81016e-09
LINC01702	21.1679	4.15493	-2.34898	7.7046e-24	6.38526e-23
LIMD2	2.28713	5.17335	1.17756	8.91582e-11	2.13377e-10
CPSF6	4.07835	8.25594	1.01745	1.73957e-49	2.08035e-45
NUP188	2.6265	5.4338	1.04882	4.52652e-34	1.91281e-32
ASRGL1	1.17832	2.53112	1.10304	1.23031e-11	3.18883e-11
LPCAT4	0.950514	2.77578	1.54611	2.17557e-17	9.18379e-17
PRKAA2	1.05644	2.41629	1.19358	9.8791e-15	3.2637e-14
CDCA4	1.67212	4.70051	1.49114	4.45314e-39	7.39654e-37
INCENP	1.36929	3.55305	1.37563	1.17717e-36	9.70878e-35
FMNL2	1.2926	3.83316	1.56826	8.12758e-15	2.70595e-14
IER5L	2.6944	5.4365	1.01271	2.14705e-07	3.94054e-07
SMARCC1	5.77505	11.9437	1.04835	5.19138e-45	7.76046e-42
STK24	1.82605	3.92237	1.103	4.56409e-26	5.07267e-25
SLC12A2	1.50098	3.48855	1.21673	3.66541e-09	7.73097e-09
CHST3	0.587388	1.74251	1.56878	2.69634e-07	4.91398e-07
TTC39A	0.876416	2.41884	1.46463	2.10281e-08	4.18149e-08
GCGR	13.3634	5.51903	-1.2758	9.77651e-08	1.84343e-07
SMOX	2.59472	6.83457	1.39727	2.18439e-16	8.35137e-16
TGFA	0.525591	2.72649	2.37503	4.91584e-11	1.20468e-10
PLEKHG6	1.51351	3.23377	1.09532	2.09081e-08	4.15971e-08
TES	3.99266	8.49734	1.08966	1.06899e-17	4.64704e-17
APOC3	5247.35	2004.37	-1.38844	4.93012e-24	4.19042e-23
AC012065.3	13.7771	6.16762	-1.15948	6.69161e-07	1.17979e-06
SPINT2	2.44264	18.2373	2.90038	3.68709e-08	7.17675e-08
ETNPPL	30.9292	7.28951	-2.08508	2.00719e-27	2.67901e-26
TEAD4	1.82359	3.77146	1.04835	9.24994e-06	1.48384e-05
PNMA1	3.29176	8.818	1.42159	1.23109e-27	1.70007e-26
LINC02608	8.22115	2.55875	-1.6839	1.30776e-13	3.9404e-13
TMC5	1.06597	3.10065	1.5404	0.000597712	0.000826554
ZBED5	1.25579	2.52946	1.01023	1.7883e-30	3.85339e-29
SYNJ2	1.58931	3.49401	1.13648	8.21598e-20	4.43188e-19
SNHG7	4.69653	9.5038	1.01691	4.53648e-16	1.68327e-15
CFHR4	19.0186	4.1357	-2.2012	3.81366e-26	4.28642e-25
CES2	132.626	57.2317	-1.21247	6.1777e-23	4.61745e-22
OSMR	2.91243	6.25082	1.10182	7.45365e-05	0.0001112
EGLN3	0.794425	2.80411	1.81956	2.07573e-12	5.69873e-12
PTGDR2	0.563235	2.06442	1.87393	4.49904e-05	6.84616e-05
CDCA7L	0.928496	3.05217	1.71687	2.23212e-22	1.58046e-21
CTHRC1	2.6838	8.72354	1.70064	2.33346e-10	5.39453e-10
SPDYC	3.57626	1.32322	-1.4344	1.31271e-13	3.95261e-13
LINC00665	0.670236	2.53816	1.92104	1.17295e-16	4.60667e-16
RMI2	1.95715	4.04615	1.04779	8.04395e-18	3.5458e-17
SGCE	5.52168	13.8058	1.3221	1.13474e-15	4.05207e-15
TSPAN15	3.78349	13.4778	1.83279	9.83844e-11	2.3494e-10
TMPRSS3	1.06493	3.204	1.58911	9.46476e-06	1.51711e-05
SH2B2	0.832155	1.78737	1.10291	3.49128e-16	1.30435e-15
THRSP	62.0373	15.1191	-2.03677	1.84424e-15	6.47733e-15
ITGB4	1.35901	7.03686	2.37238	4.0785e-14	1.28152e-13
DEF6	1.90737	3.8534	1.01454	4.94303e-09	1.03273e-08
G6PD	6.02861	25.3711	2.07329	1.62736e-24	1.4811e-23
PTAFR	0.88351	2.32185	1.39396	1.34691e-07	2.51016e-07
PLAUR	0.993001	3.2106	1.69298	9.73957e-12	2.54092e-11
MMP14	14.2403	36.9746	1.37656	1.40163e-14	4.57731e-14
FAM118A	1.51808	3.3593	1.14591	7.55925e-22	5.0447e-21
MT1X	115.684	57.0912	-1.01885	8.22131e-09	1.68816e-08
TMEM159	0.814772	2.11024	1.37294	4.65498e-05	7.07088e-05
MAP3K1	1.67729	3.88553	1.21198	6.70923e-30	1.31534e-28
DCXR	407.696	140.667	-1.53521	3.35776e-22	2.33462e-21
SPIN1	5.47578	11.1095	1.02065	2.35316e-28	3.66425e-27
APOF	48.4811	13.2538	-1.87101	2.73715e-18	1.25995e-17
HMGB2	11.8496	26.601	1.16665	2.41535e-25	2.4479e-24
WDR54	1.03837	2.59708	1.32257	5.77664e-19	2.86295e-18
CDK16	5.73614	11.5507	1.00983	6.62095e-33	2.1458e-31
KCNJ4	2.47187	0.882679	-1.48564	5.3066e-12	1.41089e-11
CLGN	2.71157	7.58319	1.48368	2.93544e-11	7.33992e-11
KIF2A	1.1628	2.65571	1.1915	1.50581e-30	3.28613e-29
NOL4L	1.02766	2.21118	1.10545	7.30924e-24	6.06601e-23
KDM5B	1.87126	4.08624	1.12677	1.08037e-24	1.00624e-23
UTP20	1.15922	2.35359	1.02171	6.41198e-39	9.58511e-37
SMARCD1	5.12615	10.6114	1.04967	3.15505e-43	2.21949e-40
TRAIP	0.812302	2.00621	1.30439	3.22083e-24	2.80948e-23
SLC2A1	1.24486	4.55516	1.87152	2.58266e-11	6.48866e-11
RNASE4	8.59534	4.00879	-1.10039	1.92085e-25	1.97689e-24
SERPINC1	1982.75	716.969	-1.46752	7.37296e-28	1.05597e-26
INHA	0.623533	2.77894	2.156	8.9417e-09	1.83106e-08
ARHGEF2	1.93537	5.79926	1.58326	3.00795e-33	1.03666e-31
GLYAT	30.5756	7.05755	-2.11514	5.25537e-25	5.06847e-24
SLC10A1	92.7054	19.9975	-2.21284	3.75796e-27	4.83762e-26
AP1G2	1.14251	3.14115	1.45908	2.94263e-25	2.95722e-24
UHRF1BP1	1.32182	2.72495	1.04371	9.64005e-30	1.84162e-28
WWTR1	3.12643	6.87721	1.13731	5.75854e-10	1.29036e-09
Z97056.1	3.43245	1.16862	-1.55443	6.07726e-15	2.04209e-14
IGHV3-30	4.47673	21.6037	2.27076	0.000427647	0.000598296
SFR1	1.2345	2.49391	1.01448	2.78175e-32	8.1139e-31
LTB	4.57423	14.8468	1.69855	2.07323e-06	3.50987e-06
ARL4C	3.59237	10.0483	1.48394	9.13798e-15	3.0255e-14
DRAM1	2.46013	6.01913	1.29082	1.18432e-23	9.57628e-23
HROB	0.702323	1.79834	1.35646	1.53068e-26	1.81963e-25
IGF2BP1	0.606467	3.81761	2.65417	2.37743e-20	1.36756e-19
PFKFB3	3.4769	12.4079	1.83539	2.54938e-12	6.9433e-12
NREP	2.64937	7.36926	1.47587	1.01585e-24	9.49103e-24
MAP3K21	0.662572	2.08021	1.65058	1.76506e-15	6.20468e-15
TUFT1	2.63959	5.8641	1.1516	2.80709e-28	4.32045e-27
ATP13A2	2.5928	5.59354	1.10925	7.98233e-23	5.87812e-22
OGFRL1	0.852353	1.7877	1.06858	1.04683e-15	3.75497e-15
SNHG3	1.84073	5.61307	1.60851	1.15324e-27	1.59995e-26
BZW2	5.9988	12.2189	1.02636	2.13177e-25	2.1771e-24
LAMC1	12.7517	28.0457	1.13709	7.98233e-23	5.87812e-22
TFDP1	7.12762	14.4759	1.02216	2.33381e-19	1.20198e-18
ALOX5AP	1.5043	3.64685	1.27756	1.48471e-05	2.34584e-05
PLEKHA2	1.33567	2.85216	1.09449	7.63774e-18	3.3767e-17
PLGLA	2.55405	0.980969	-1.38051	1.69256e-10	3.965e-10
MTMR2	1.22176	2.97014	1.28157	5.13239e-32	1.43407e-30
FETUB	55.3938	24.7934	-1.15977	1.97421e-15	6.90945e-15
FOXJ1	0.301278	3.1406	3.38187	3.01477e-27	3.92741e-26
STMN1	8.63915	21.0032	1.28165	3.60134e-24	3.11638e-23
MFSD6	1.24902	3.46634	1.47262	3.35549e-17	1.38997e-16
APAF1	0.817213	1.64554	1.00978	2.16782e-22	1.53584e-21
PIGS	2.37701	5.65183	1.24957	8.81236e-34	3.44402e-32
POLR3D	1.20821	2.55462	1.08024	8.98264e-23	6.56622e-22
CCL28	0.984293	2.41096	1.29245	1.14993e-06	1.98815e-06
SLC6A13	2.31718	0.864753	-1.42201	5.78343e-17	2.33899e-16
SULT2A1	302.485	148.48	-1.02659	2.91334e-13	8.54356e-13
IFI27	103.326	32.2744	-1.67874	9.97487e-09	2.03774e-08
EEF1A1P5	7.57245	15.1762	1.00298	2.06702e-08	4.11443e-08
ITGA2	0.723636	2.26866	1.6485	5.56255e-16	2.04559e-15
RHOV	0.249366	3.15832	3.66282	1.25641e-09	2.74437e-09
AC020916.1	1.44291	3.01339	1.06241	1.52533e-05	2.4062e-05
CLIC3	0.548402	2.45578	2.16288	1.16733e-06	2.01679e-06
SLC22A1	119.93	22.7458	-2.39852	2.26856e-23	1.77899e-22
SERPINI1	2.05905	5.16603	1.32707	1.88193e-17	8.00069e-17
ZNF432	0.676585	1.50222	1.15075	8.78301e-27	1.0707e-25
AL354872.1	12.6507	3.287	-1.94437	6.00363e-26	6.55684e-25
SLC6A11	1.18138	2.81003	1.25011	0.000239096	0.000341741
LARGE2	1.18267	4.86273	2.03972	1.74267e-17	7.43511e-17
PIK3CD	0.857326	1.76945	1.04538	1.4842e-07	2.75742e-07
CYP2A7	36.3689	8.22999	-2.14374	3.83125e-15	1.30946e-14
PRTFDC1	0.875966	2.10317	1.26362	4.40108e-14	1.38107e-13
AACS	0.682867	1.59362	1.22263	1.80088e-27	2.43078e-26
PFKP	2.01707	9.32868	2.20941	6.38045e-09	1.32082e-08
FAM83D	3.79899	7.70249	1.01971	3.40572e-18	1.55454e-17
NAT2	6.77676	1.84396	-1.87779	1.26631e-17	5.475e-17
SLC44A3	3.76412	10.3056	1.45305	1.07034e-19	5.70419e-19
MACROH2A2	4.4621	16.2657	1.86604	9.79752e-21	5.84381e-20
IL1RAP	1.90376	4.01848	1.07779	1.24503e-10	2.94721e-10
GAL3ST1	2.66618	12.8148	2.26496	3.44503e-23	2.64436e-22
HDAC2	1.82421	3.94353	1.11222	5.48038e-38	6.0685e-36
WDR72	1.84034	4.6661	1.34225	2.48826e-08	4.91529e-08
ADAM17	1.0686	2.56637	1.26401	2.17987e-23	1.71394e-22
SLC16A3	1.6049	5.35564	1.73857	1.97663e-13	5.87878e-13
FYB1	0.962013	2.21837	1.20537	3.94317e-06	6.52051e-06
TMC6	1.56216	4.72188	1.59582	7.75496e-15	2.58549e-14
TARBP1	2.9513	6.32322	1.09931	8.13483e-28	1.15953e-26
MFSD10	5.06708	15.3654	1.60046	9.23807e-26	9.89947e-25
EEF1A1P19	0.789781	1.60228	1.0206	1.5263e-14	4.9695e-14
NFYA	4.23469	9.03689	1.09357	9.89994e-36	6.39964e-34
AC137723.1	1.51032	0.582903	-1.37352	1.01615e-09	2.24086e-09
POF1B	0.493976	2.16832	2.13407	1.05444e-09	2.32059e-09
KDM8	5.65015	2.39384	-1.23897	1.95196e-08	3.89448e-08
YEATS2	1.10371	2.64291	1.25977	1.03416e-43	8.71322e-41
DNMT1	2.70891	6.93583	1.35636	1.33415e-35	8.30996e-34
IGHV3-74	2.07934	8.78881	2.07954	0.00047154	0.000657704
BCAM	25.2004	60.5631	1.26499	1.8906e-13	5.6285e-13
BTBD3	1.99174	4.54269	1.18952	4.15593e-33	1.40002e-31
CFHR2	11.1553	4.74585	-1.23299	2.14636e-22	1.52275e-21
TONSL	1.62182	3.5588	1.13378	3.44722e-27	4.46162e-26
MYO5C	1.08205	2.2736	1.07121	4.01752e-20	2.24512e-19
AL662795.2	0.717128	1.79115	1.32059	4.27687e-27	5.46443e-26
LINC02768	1.89447	0.763977	-1.31019	5.92647e-13	1.69597e-12
SLC34A2	0.377453	13.3247	5.14166	9.45205e-08	1.78517e-07
ATP9A	4.31383	8.77501	1.02443	6.7187e-20	3.66054e-19
NT5DC2	2.85366	11.5199	2.01324	3.05372e-26	3.48136e-25
ZWINT	4.70451	12.8185	1.44611	1.63423e-28	2.58174e-27
ADAM9	3.10979	9.25735	1.57378	4.62011e-21	2.86576e-20
PLCB1	0.710394	1.66694	1.23051	1.21832e-18	5.80935e-18
E2F3	1.87624	4.28254	1.19062	3.2887e-26	3.72793e-25
C4orf46	0.71786	1.60453	1.16037	8.50272e-33	2.71883e-31
MCUB	0.850625	1.93208	1.18356	6.65746e-08	1.27163e-07
CHORDC1	0.9289	2.1013	1.17769	4.10652e-33	1.38729e-31
GYS2	17.404	4.95755	-1.81172	1.89116e-22	1.35104e-21
TYRO3	0.574557	1.83727	1.67704	4.81141e-26	5.32282e-25
IGHGP	5.41396	13.4252	1.31019	0.000720422	0.000989267
PTOV1-AS2	1.08871	2.28073	1.06688	4.88912e-21	3.01232e-20
NID1	19.8435	41.1752	1.0531	4.65377e-15	1.5793e-14
MT2P1	6.55177	2.75472	-1.24998	3.53885e-06	5.87712e-06
MEP1A	1.05197	7.3373	2.80215	1.36146e-12	3.78291e-12
AZGP1	349.236	150.006	-1.21918	1.35688e-21	8.8238e-21
SPRED1	1.07205	2.46067	1.19867	5.36287e-15	1.81171e-14
FMNL1	1.13192	2.48631	1.13523	1.45988e-11	3.76916e-11
AGAP1	0.891313	1.88502	1.08057	4.98456e-31	1.19221e-29
EHF	1.09298	3.5772	1.71057	4.71284e-09	9.8671e-09
ZNF550	0.655595	1.569	1.25897	6.6819e-28	9.6625e-27
CHAF1B	0.752351	2.46885	1.71436	1.98243e-30	4.24112e-29
TNFRSF19	1.39165	4.06404	1.54612	6.69433e-08	1.27847e-07
GTPBP2	5.72329	11.5245	1.00979	1.32725e-30	2.94482e-29
C12orf49	1.59808	4.70574	1.55808	1.6901e-33	6.0334e-32
CCNB1	5.15213	15.991	1.63402	2.6046e-31	6.53006e-30
CENPM	2.57818	6.81749	1.40289	9.91028e-23	7.22225e-22
UGT2B7	157.436	49.4587	-1.67047	9.89316e-18	4.31639e-17
AURKB	2.09855	7.45801	1.8294	5.50024e-29	9.29059e-28
BEX4	4.24623	9.19214	1.11422	6.99584e-10	1.55943e-09
KMO	4.21615	2.02037	-1.06131	2.06104e-12	5.6636e-12
UBAP2	1.4427	3.17039	1.13589	1.43861e-41	4.91551e-39
LAD1	14.6288	38.9032	1.41108	3.13086e-08	6.13904e-08
TRAC	4.66404	9.62359	1.045	0.000408979	0.000573184
CCDC14	1.1074	2.44827	1.14459	4.77792e-23	3.6164e-22
SLC25A24	0.607378	1.78103	1.55205	1.86577e-11	4.75345e-11
IGHV1-46	1.90635	10.7053	2.48944	0.00011251	0.000165316
CDCA7	0.367253	2.76756	2.91377	6.57555e-27	8.08191e-26
DDX11	0.941317	2.46532	1.38902	8.87542e-31	2.02947e-29
CD37	1.58147	3.1895	1.01207	6.19712e-07	1.09632e-06
KIRREL2	0.0250135	3.56977	7.15698	2.55618e-06	4.29585e-06
RNF144A	0.578937	1.91025	1.72228	2.7374e-24	2.40887e-23
C1orf210	3.71301	7.55068	1.02402	3.34501e-05	5.13846e-05
IGLV1-44	7.96756	32.8822	2.0451	0.000592833	0.000819996
RFC3	2.21166	4.57219	1.04776	2.03726e-24	1.82499e-23
PLCD3	0.665097	2.10477	1.66203	4.22038e-13	1.22207e-12
KRT19	1.55357	34.1654	4.45888	9.83792e-13	2.76048e-12
HAO2	32.0227	14.969	-1.09712	2.2257e-11	5.63086e-11
MAL2	14.0778	38.0866	1.43586	8.21598e-20	4.43188e-19
TOX3	1.59065	3.22438	1.0194	6.96348e-11	1.68167e-10
MFSD2A	15.0094	3.40956	-2.13821	7.75084e-19	3.788e-18
MCM3	13.7956	32.2598	1.22553	1.67298e-32	5.07796e-31
AC239800.2	2.03023	0.511242	-1.98957	6.57486e-21	3.99537e-20
TIGD1	0.8165	1.97572	1.27485	9.17275e-28	1.30127e-26
PLA2G2A	365.032	127.223	-1.52066	0.000101698	0.000150093
CHST4	0.512446	3.19656	2.64105	2.92382e-06	4.88352e-06
CDK19	1.31782	3.2212	1.28945	2.90696e-29	5.15792e-28
ASPM	1.13036	3.41698	1.59593	5.67007e-28	8.32005e-27
CA9	2.40937	26.5703	3.46309	2.69945e-17	1.12916e-16
NRSN2	2.88504	8.76633	1.60338	1.1064e-17	4.7992e-17
PKDCC	3.5701	8.59344	1.26727	5.0755e-12	1.35124e-11
CENPH	1.40208	3.2092	1.19465	3.06116e-27	3.97486e-26
KRT80	0.280203	3.17325	3.50142	5.91874e-13	1.69417e-12
ZNF587	0.751543	1.72542	1.19902	5.31657e-32	1.48207e-30
GRAMD1A	5.80333	12.3715	1.09207	1.07918e-16	4.24956e-16
PRIM1	2.48511	5.57266	1.16506	2.49654e-26	2.87631e-25
SMC4	1.3509	4.03889	1.58003	5.54719e-28	8.15976e-27
CHST2	0.677025	1.70225	1.33016	2.95543e-11	7.38641e-11
EVC	0.778795	2.5625	1.71824	1.6363e-14	5.31319e-14
ITGA3	1.07604	5.36832	2.31873	3.83183e-06	6.34166e-06
SNHG1	3.6529	9.72978	1.41336	4.17235e-37	3.78008e-35
TTC36	18.6065	2.60497	-2.83647	3.88328e-22	2.68597e-21
NUAK2	2.4121	6.08044	1.33389	3.58536e-15	1.22928e-14
CYP3A4	461.4	167.776	-1.45948	5.90529e-10	1.32225e-09
KLKB1	34.8795	15.7544	-1.14663	8.29136e-20	4.46852e-19
LIN9	0.622997	1.6943	1.44339	1.56601e-37	1.56066e-35
SPAG5	3.92582	8.31027	1.0819	2.77405e-16	1.04884e-15
IGHV4-39	9.85886	42.9662	2.12371	4.16241e-05	6.34361e-05
GINS1	1.2442	4.35229	1.80655	3.41907e-35	1.9018e-33
FNBP1L	3.62625	8.03553	1.14791	7.89077e-27	9.64885e-26
MEX3A	0.545213	2.2832	2.06617	7.98233e-23	5.87812e-22
SMURF2	1.16119	2.49326	1.10243	1.18519e-28	1.91795e-27
CYP2A6	396.326	94.062	-2.075	2.70132e-20	1.54348e-19
BEX2	4.18722	11.227	1.42291	2.34081e-13	6.92913e-13
AC010547.2	0.33576	2.38108	2.82611	1.24015e-06	2.13765e-06
HPR	254.395	71.927	-1.82247	2.02906e-27	2.70218e-26
CD14	226.578	103.503	-1.13034	5.8474e-21	3.5751e-20
GSTA7P	5.81703	2.46695	-1.23755	2.76786e-16	1.04716e-15
SLAMF8	1.73606	3.78932	1.12613	4.85714e-05	7.36578e-05
ZWILCH	1.22714	2.50214	1.02786	9.7497e-30	1.8596e-28
AC021074.2	0.949116	2.16955	1.19274	2.52425e-08	4.9839e-08
RCAN3	0.67667	1.71471	1.34144	4.23888e-26	4.73764e-25
CLDN4	4.22576	17.2621	2.03032	1.15113e-09	2.52733e-09
PPP1R37	3.08327	6.17786	1.00265	1.91419e-26	2.23335e-25
MEG3	0.854727	4.84713	2.5036	9.05742e-08	1.71253e-07
SYNGR1	1.54345	3.15445	1.03123	2.07958e-07	3.822e-07
MZB1	1.63377	4.45044	1.44575	0.00052468	0.000728938
IFFO2	1.41298	3.30688	1.22674	1.15955e-22	8.41448e-22
BEX1	4.19352	13.8127	1.71976	5.22114e-06	8.54986e-06
PLEK	2.61496	5.81268	1.15241	2.73936e-07	4.98705e-07
DTX3	1.19477	2.87847	1.26857	4.56839e-11	1.12207e-10
SPATC1L	1.63558	4.18016	1.35376	3.75977e-15	1.2865e-14
SLC28A1	14.0857	5.74788	-1.29313	4.07912e-16	1.51686e-15
MASTL	1.6737	3.56354	1.09027	3.16726e-32	9.17124e-31
CORO2A	1.25232	3.24141	1.37201	2.08481e-17	8.81307e-17
NUF2	1.04452	4.04922	1.9548	5.15342e-33	1.71194e-31
MYCN	0.568375	1.94262	1.77309	0.00012277	0.000179994
C2CD5	2.01546	4.29491	1.09152	9.37996e-37	7.89964e-35
NEO1	2.67465	5.63342	1.07466	2.98939e-13	8.75371e-13
SLC25A19	1.13192	2.37771	1.0708	9.11858e-32	2.47839e-30
UTRN	2.24956	5.01845	1.1576	3.34774e-28	5.06139e-27
KANSL1L	0.866855	1.75998	1.0217	2.25769e-16	8.60689e-16
MEIS2	1.04705	2.37296	1.18035	4.56839e-11	1.12207e-10
FANCD2	0.540771	1.74479	1.68996	2.59755e-38	3.35536e-36
NEMP1	1.64674	3.7996	1.20623	2.57881e-30	5.42957e-29
ITGAE	0.856064	2.09258	1.28949	5.25003e-17	2.12903e-16
UNC119B	2.00019	4.48453	1.16482	8.80579e-30	1.69579e-28
LINC02041	0.479303	2.05999	2.10363	8.82822e-15	2.92862e-14
ATP2B1	2.28208	5.3298	1.22373	1.71e-35	1.05412e-33
AL355102.4	0.99327	4.89753	2.30179	2.76473e-11	6.92574e-11
TEDC2	1.25774	2.83234	1.17117	1.28467e-18	6.10144e-18
SLC1A5	4.07593	16.2293	1.9934	4.94941e-17	2.01395e-16
TOPBP1	2.47553	5.33838	1.10866	1.1356e-33	4.29766e-32
BCOR	2.08184	4.26129	1.03343	3.93364e-29	6.81773e-28
PARD6B	1.275	2.80826	1.13918	8.88851e-25	8.35018e-24
PAK4	4.32476	9.19689	1.08853	6.26774e-30	1.2369e-28
MEX3C	1.56997	3.23667	1.04377	3.28845e-29	5.74111e-28
ZCCHC3	4.92446	10.0594	1.0305	1.38795e-34	6.45854e-33
EMILIN2	0.813376	1.78733	1.13581	3.53989e-13	1.03001e-12
SPINDOC	1.98875	5.55119	1.48093	5.42999e-34	2.23152e-32
CA11	1.1184	2.4811	1.14955	1.50489e-05	2.37553e-05
EMB	0.786879	1.64336	1.06244	4.59592e-05	6.98825e-05
ACADL	2.98345	1.07937	-1.4668	4.45266e-17	1.82236e-16
HKDC1	6.65988	16.4356	1.30326	6.67076e-11	1.61293e-10
FGGY	17.2135	8.60471	-1.00034	2.13837e-15	7.46213e-15
CYP8B1	96.2946	25.528	-1.91537	1.54789e-20	9.04312e-20
SMAGP	1.95354	4.26458	1.12631	7.47994e-19	3.66159e-18
GCA	1.97828	4.12095	1.05873	8.1236e-17	3.2405e-16
TFF1	2.43195	10.9474	2.1704	6.90466e-06	1.11994e-05
DAO	16.7817	7.22289	-1.21624	1.81873e-17	7.74855e-17
MMP12	0.625349	3.65182	2.54588	1.22253e-10	2.89567e-10
ADRA2C	1.5627	5.18171	1.72939	8.7527e-06	1.40615e-05
ISYNA1	5.07252	15.9449	1.65232	5.56361e-07	9.87169e-07
WASF1	1.79016	5.09485	1.50895	8.49998e-32	2.33145e-30
KIF12	4.8286	17.8429	1.88567	2.55541e-20	1.46501e-19
AP001065.3	3.4533	1.48062	-1.22178	1.64084e-17	7.0132e-17
CDKN1C	1.82111	5.84222	1.6817	8.7527e-06	1.40615e-05
ADM2	3.04842	6.33033	1.05422	1.35875e-11	3.51413e-11
CLEC3B	9.68116	4.21613	-1.19926	2.18439e-16	8.35137e-16
GREM2	5.55915	2.58696	-1.10361	1.02237e-10	2.43751e-10
PELI1	2.89355	6.45329	1.1572	7.49841e-20	4.06867e-19
CYP2B6	38.1292	13.9262	-1.4531	5.22273e-10	1.17425e-09
CTH	40.909	12.4192	-1.71985	5.25835e-15	1.77791e-14
PSRC1	1.22262	3.18185	1.37989	2.62823e-24	2.31622e-23
RAD51	0.700602	1.97854	1.49777	2.68605e-28	4.1395e-27
ASPDH	33.0649	9.78252	-1.75702	2.14383e-24	1.91329e-23
RASEF	0.970736	2.49707	1.36309	6.38234e-06	1.03902e-05
PXYLP1	0.817061	1.67519	1.03581	2.5793e-17	1.08193e-16
RAB34	4.21936	10.4687	1.31098	1.20223e-07	2.2493e-07
LINC00205	0.825166	2.30222	1.48027	5.46749e-31	1.29221e-29
SCX	0.776517	1.6699	1.10467	1.80291e-10	4.20537e-10
AFP	90.2422	388.422	2.10575	3.17295e-12	8.59272e-12
PRSS22	0.111029	2.43486	4.45483	1.0579e-09	2.32735e-09
KLHL23	1.97713	4.38386	1.14879	3.13174e-25	3.12625e-24
WDR91	2.36992	5.42837	1.19568	2.55663e-23	1.99314e-22
KIF11	0.987324	3.44402	1.8025	1.89626e-37	1.82882e-35
AC048341.2	0.766563	1.58721	1.05001	9.2468e-13	2.59888e-12
PPM1H	1.10575	2.75441	1.31672	2.13239e-10	4.94307e-10
LINC02381	0.789165	4.61717	2.54861	5.57804e-15	1.88015e-14
TFF2	1.06326	10.1559	3.25576	2.00133e-06	3.39104e-06
Z82246.1	1.64158	0.670791	-1.29115	1.23745e-05	1.96843e-05
SLC7A10	0.0898954	2.43905	4.76193	1.79587e-15	6.30927e-15
NOTCH1	2.1008	4.46019	1.08616	1.83433e-17	7.80945e-17
GPR160	0.714817	1.67392	1.22759	1.21832e-18	5.80935e-18
PLA2G7	2.53507	6.3798	1.33148	7.11323e-08	1.35587e-07
LINC01093	6.46917	0.835645	-2.95262	3.40758e-17	1.41057e-16
PFN1P11	5.86453	2.10066	-1.48117	1.97116e-07	3.63055e-07
TMEM237	0.642373	1.59859	1.31532	1.11344e-34	5.39092e-33
CD24	26.7226	79.6231	1.57512	1.40844e-16	5.47402e-16
IGHV3-23	9.93347	44.4714	2.16251	0.000403671	0.000566077
MMP11	1.9596	7.28582	1.89454	9.76376e-19	4.71396e-18
IGHV1-24	3.72802	17.9002	2.26349	9.59858e-05	0.000141978
TNC	1.42002	4.73307	1.73686	2.23742e-05	3.48766e-05
RBBP8	2.05368	4.4239	1.10711	1.73922e-21	1.12065e-20
OLFM4	0.0653999	6.71452	6.68185	8.18104e-08	1.55322e-07
BIK	1.12861	3.15075	1.48115	2.59423e-10	5.97887e-10
AP006216.2	1.9318	0.849071	-1.18599	4.04163e-18	1.835e-17
MELTF	0.587176	2.97668	2.34184	1.29138e-17	5.57932e-17
SLC38A1	2.34673	7.57063	1.68976	6.00706e-14	1.8669e-13
RHOBTB1	3.97996	8.45039	1.08626	4.18867e-11	1.03219e-10
YBX3	2.5045	6.19875	1.30745	1.3768e-09	2.99802e-09
TTYH3	8.69431	21.2343	1.28825	1.1064e-17	4.7992e-17
ASAP1	2.18217	5.11061	1.22773	8.10278e-25	7.65412e-24
TTR	1198.98	474.842	-1.33629	1.19536e-17	5.17759e-17
DGCR5	1.61982	0.769305	-1.07421	1.23915e-05	1.97036e-05
SNHG12	1.21124	2.74741	1.18159	6.48006e-22	4.37084e-21
TUBA1B	17.5766	43.6872	1.31356	3.06788e-34	1.35884e-32
FAM83A-AS1	10.8482	0.6683	-4.02081	7.69393e-18	3.40029e-17
SMIM32	1.42555	6.30887	2.14586	6.73066e-05	0.000100867
LZTS2	3.76062	7.88534	1.0682	2.45658e-29	4.40454e-28
WFDC2	3.67823	9.33951	1.34433	0.000205195	0.000294837
CCDC88A	1.09171	2.27699	1.06053	6.24399e-20	3.41123e-19
BUB1	0.752639	2.69627	1.84094	1.81935e-35	1.10445e-33
TNFRSF21	5.45699	17.0205	1.64109	7.6074e-21	4.59944e-20
CYP39A1	6.09834	2.13755	-1.51246	5.82925e-08	1.11879e-07
HSPA7	1.32339	3.4752	1.39286	2.12699e-08	4.22677e-08
LDOC1	2.16829	9.07777	2.06578	1.89904e-05	2.97182e-05
LINC01554	28.8788	5.57272	-2.37356	5.26308e-18	2.3671e-17
LILRB4	0.758694	1.69574	1.16032	3.24005e-06	5.39662e-06
AL390719.1	0.689909	1.52739	1.14659	5.33929e-10	1.19956e-09
SMCHD1	1.44234	2.91032	1.01277	4.5135e-27	5.7179e-26
CTSC	5.11325	11.2062	1.13199	1.51348e-10	3.55733e-10
ST14	7.81103	24.2858	1.63653	1.04251e-09	2.2956e-09
UBE2T	5.7309	14.1895	1.30799	4.19433e-26	4.69663e-25
BHMT	114.802	50.8636	-1.17444	8.45892e-11	2.02604e-10
TRPV4	1.33497	3.04771	1.19092	0.000177359	0.000256629
CXCR3	0.771445	1.57347	1.02831	0.000590116	0.000816333
INSIG1	182.423	78.0867	-1.22414	2.33381e-19	1.20198e-18
CTTNBP2NL	0.894878	1.90375	1.08908	6.59869e-16	2.41179e-15
PRODH	2.35689	0.849989	-1.47137	0.000232422	0.00033248
UGT2B17	12.6654	5.6343	-1.16859	1.72173e-05	2.70424e-05
LDHD	41.9888	17.4679	-1.2653	2.05232e-29	3.73004e-28
IL4I1	0.995799	3.3283	1.74086	1.20661e-12	3.3644e-12
DLG5	1.12336	2.67864	1.25368	6.88025e-24	5.74186e-23
SLC36A1	0.941933	2.03887	1.11408	4.65467e-28	6.90635e-27
COLCA2	0.639394	3.06321	2.26027	1.84803e-31	4.71229e-30
MT2A	449.915	208.703	-1.1082	2.71011e-06	4.54306e-06
UHRF1	0.680984	2.50687	1.8802	2.71774e-29	4.83653e-28
GLYATL1	19.3194	5.60489	-1.78529	1.29993e-27	1.78483e-26
FCER1G	15.0561	34.8811	1.2121	8.55314e-06	1.37557e-05
IGLV9-49	0.653801	2.65947	2.02422	0.000295711	0.000419652
HJURP	1.16144	4.29683	1.88736	4.36462e-34	1.85753e-32
SLC26A2	0.829361	1.70458	1.03935	2.24605e-23	1.76366e-22
NCAPG2	1.22982	3.04261	1.30687	6.4116e-30	1.26112e-28
LINC01595	8.41222	3.33065	-1.33668	8.14707e-13	2.30007e-12
CLIP2	1.95921	4.68966	1.25921	2.13239e-10	4.94307e-10
ESRP1	0.304567	4.1523	3.76908	5.00269e-08	9.64021e-08
USP27X	1.08612	2.26832	1.06244	4.93573e-12	1.31667e-11
ITGAV	6.25526	13.507	1.11057	1.52468e-07	2.83043e-07
TPM4	12.9922	29.0744	1.1621	3.40644e-16	1.27504e-15
CEP72	1.1671	2.4021	1.04136	4.00996e-21	2.50549e-20
GPRIN1	0.630334	1.73419	1.46008	1.08204e-23	8.83287e-23
ZNF256	0.695997	1.64679	1.2425	7.89831e-21	4.76569e-20
MKI67	1.42982	4.91223	1.78054	3.28131e-32	9.4557e-31
FABP4	13.3842	3.83822	-1.80203	6.89343e-12	1.81863e-11
BX842568.4	1.47368	0.608993	-1.27492	2.63356e-13	7.75924e-13
RAI1	1.07045	2.65766	1.31194	1.29316e-29	2.41262e-28
EPCAM	6.3041	45.7092	2.85812	1.00341e-14	3.31222e-14
UCHL1	4.10221	12.6588	1.62567	2.4868e-05	3.8623e-05
BUB1B	0.718552	3.01775	2.07031	2.56425e-38	3.35536e-36
CFHR3	39.2252	9.42202	-2.05767	4.36575e-21	2.71503e-20
IFT140	0.730451	1.48406	1.02269	2.60262e-10	5.99591e-10
DVL2	2.70767	5.58304	1.044	1.06672e-35	6.82185e-34
C3P1	23.6665	7.35638	-1.68578	5.45467e-24	4.60031e-23
ZBED8	0.774744	1.60074	1.04695	6.98073e-28	1.0034e-26
ANXA4	13.5459	31.7803	1.23027	2.40023e-07	4.39039e-07
ZNF618	1.07123	2.32375	1.11718	1.93057e-19	1.0025e-18
SLFN11	0.897781	1.84764	1.04125	9.86417e-06	1.5794e-05
PFN2	2.57023	8.00627	1.63923	1.12092e-08	2.28133e-08
NTS	27.0161	257.734	3.254	1.1154e-05	1.77972e-05
SNHG29	26.9796	54.2571	1.00794	6.03424e-16	2.21225e-15
TRIM71	0.340936	2.13013	2.64337	4.75492e-17	1.93877e-16
VGLL4	1.33475	2.8159	1.07703	2.10406e-18	9.80228e-18
VAV1	0.861516	1.72523	1.00184	6.35353e-06	1.03447e-05
ZNF320	0.514375	1.87014	1.86226	2.29229e-21	1.45817e-20
E2F5	0.62652	1.59283	1.34616	6.9991e-22	4.70237e-21
TTK	0.610605	2.36814	1.95544	3.56353e-32	1.02197e-30
SLC41A1	1.54682	3.8025	1.29765	1.27338e-18	6.05018e-18
TGIF2	4.15162	8.92525	1.10422	3.31091e-23	2.54959e-22
STK26	1.27155	3.727	1.55143	1.2328e-23	9.9548e-23
C6orf223	0.741723	3.25756	2.13484	2.22266e-16	8.48954e-16
LIMK1	1.64549	4.7765	1.53743	5.79565e-28	8.4835e-27
MIR570	2.59419	5.20194	1.00376	3.69662e-16	1.37934e-15
UCK2	3.51294	7.24817	1.04494	2.18897e-27	2.91189e-26
MNDA	0.96725	2.2425	1.21315	2.9088e-08	5.71392e-08
DNAJC10	1.65194	3.37083	1.02894	6.29915e-27	7.77415e-26
PHF19	1.25059	3.11319	1.31579	2.65986e-27	3.48785e-26
ERP27	0.501441	2.01778	2.00862	2.34172e-12	6.40114e-12
HSF2	1.85562	3.76155	1.01942	9.11858e-32	2.47839e-30
ENO2	0.673191	3.08096	2.19429	2.85957e-18	1.31277e-17
LPAR2	0.724625	3.66293	2.33769	1.52558e-19	7.96349e-19
ACSM2B	40.1013	15.6802	-1.35471	1.88121e-25	1.94111e-24
FLNA	13.6027	34.9563	1.36166	1.95196e-08	3.89448e-08
FNDC5	14.3645	2.97524	-2.27143	6.19163e-14	1.92127e-13
F9	92.6224	27.1241	-1.77179	1.46907e-24	1.34222e-23
HMMR	1.52999	3.9461	1.3669	6.49013e-23	4.83586e-22
CDH24	0.61648	1.60402	1.37956	5.12331e-14	1.59931e-13
NDE1	0.786041	1.63877	1.05993	2.10055e-24	1.87887e-23
LTBP1	2.27052	5.01832	1.14418	2.20119e-08	4.37059e-08
ALOX5	1.28102	3.64261	1.50768	2.88056e-09	6.12419e-09
LHFPL2	1.1004	2.79547	1.34506	3.10584e-21	1.959e-20
NSD2	1.15512	3.01344	1.38337	7.59703e-40	1.65187e-37
ANKS6	0.916632	2.30383	1.32962	3.86119e-21	2.41506e-20
HEATR1	1.96824	4.35525	1.14585	5.87655e-33	1.91492e-31
NSD3	1.25665	2.59042	1.04361	5.88017e-23	4.40332e-22
SENP1	1.07943	2.21194	1.03505	2.53872e-40	6.32512e-38
FIGNL1	1.05914	2.26185	1.09461	3.93401e-25	3.85314e-24
CDCA3	0.818491	2.50366	1.613	2.40565e-28	3.73626e-27
CNOT11	11.7901	24.4509	1.05231	1.12657e-42	5.85767e-40
QPCT	1.10897	2.24339	1.01646	3.98068e-20	2.22557e-19
SKA1	1.07985	3.46365	1.68146	1.84239e-25	1.90269e-24
AC009005.1	1.00318	2.04324	1.02628	6.75956e-11	1.63309e-10
RELN	3.14929	10.732	1.76881	5.85354e-06	9.55143e-06
NUSAP1	5.23036	14.0739	1.42804	1.60213e-29	2.95678e-28
TCF19	3.59221	8.90424	1.30962	3.94551e-24	3.39456e-23
RBPJL	0.00922778	3.05153	8.36933	8.31636e-05	0.000123578
HID1	1.45281	4.64562	1.67703	3.2652e-13	9.52867e-13
CELSR1	0.878935	1.78723	1.0239	3.07569e-07	5.57475e-07
MARCKSL1	27.9007	67.6682	1.27818	1.07123e-23	8.75061e-23
PTHLH	0.241613	2.86622	3.56838	9.30031e-14	2.84073e-13
FNBP4	2.72498	5.47228	1.0059	2.60007e-36	1.98052e-34
DRD4	0.504776	1.96943	1.96406	0.000528567	0.000733821
MIR3189	0.930297	2.47151	1.40963	7.0247e-10	1.56557e-09
CYP1A1	23.4201	10.7001	-1.13012	2.85678e-07	5.19292e-07
TM6SF2	8.39888	3.28181	-1.3557	1.61085e-19	8.39398e-19
TMX2P1	0.824632	1.85352	1.16845	1.4773e-19	7.72163e-19
SIPA1L3	1.94011	4.23656	1.12676	1.80682e-21	1.15984e-20
UBA2	8.70323	17.6744	1.02204	1.73403e-45	2.96247e-42
MFAP2	0.446392	2.25427	2.33628	2.00719e-14	6.47355e-14
OIP5	1.15749	3.13941	1.43949	3.08624e-26	3.51508e-25
ACMSD	26.8165	12.0089	-1.15902	7.29548e-20	3.96035e-19
BRD3	1.99773	4.0216	1.00941	7.55925e-22	5.0447e-21
SAA4	152.597	62.2704	-1.29311	3.28516e-17	1.36225e-16
SCRN1	0.922434	4.29523	2.21922	2.54191e-13	7.5003e-13
ATP1B3	8.74605	17.853	1.02946	2.2764e-16	8.6699e-16
FBXO46	3.61537	7.98504	1.14316	2.40458e-34	1.07702e-32
PIAS3	1.86445	3.84263	1.04334	3.51023e-25	3.46933e-24
LYZ	130.734	274.518	1.07027	1.76239e-07	3.25706e-07
GPX8	0.853899	2.16732	1.34378	2.45938e-06	4.13958e-06
SMIM22	0.325715	2.84243	3.12544	4.54669e-09	9.53344e-09
SCARA3	3.7505	8.25241	1.13773	4.56265e-08	8.81782e-08
OPN1SW	0.990695	2.10809	1.08942	1.20343e-20	7.09305e-20
MROH2A	1.82339	0.33178	-2.45833	9.67943e-07	1.68495e-06
OBI1	0.966467	1.97631	1.03202	1.08451e-28	1.76219e-27
COX7A1	9.1458	3.53466	-1.37154	0.000392432	0.000550768
FERMT1	0.600454	1.67174	1.47722	1.71207e-13	5.10972e-13
AC008537.3	2.44057	1.17073	-1.0598	8.16175e-07	1.42741e-06
RAB25	0.215903	10.5483	5.61048	5.80968e-06	9.48246e-06
MICAL1	1.67683	3.45713	1.04384	6.92466e-13	1.96703e-12
FOXM1	1.94179	7.11428	1.87333	5.42999e-34	2.23152e-32
COL6A3	3.22881	6.58509	1.0282	1.5659e-06	2.67791e-06
CTSV	0.260745	3.1837	3.60999	9.27207e-28	1.3138e-26
PLEKHB2	4.05725	8.61075	1.08564	9.70626e-21	5.79227e-20
LINC01018	16.0746	4.69072	-1.7769	1.55197e-18	7.31286e-18
TMEM158	0.363771	2.00205	2.46038	1.22796e-05	1.95411e-05
RBL1	0.630455	1.69503	1.42685	3.46477e-34	1.50673e-32
MIR4292	1.22754	3.26577	1.41165	5.583e-20	3.07399e-19
HRG	530.397	209.544	-1.33982	2.40963e-17	1.01396e-16
IL32	161.146	78.1152	-1.04469	7.1285e-10	1.58781e-09
SAA2-SAA4	58.5177	9.82895	-2.57376	2.96477e-13	8.68798e-13
NCS1	1.21613	3.0674	1.33472	5.91641e-12	1.56744e-11
GRAMD1B	0.597974	1.78702	1.5794	3.36933e-08	6.58826e-08
COL2A1	1.438	7.40332	2.3641	1.79275e-05	2.81137e-05
RAD51AP1	0.961877	2.99692	1.63956	2.83294e-33	9.84858e-32
AL161668.4	3.25932	1.37736	-1.24266	6.25452e-12	1.65482e-11
CYP2S1	0.840161	1.88422	1.16523	3.02879e-06	5.05374e-06
PCK1	132.897	43.2242	-1.62039	5.32194e-21	3.26553e-20
FANCG	1.99631	4.62041	1.21068	5.49623e-34	2.25101e-32
HLA-DQA2	5.42707	12.1185	1.15896	5.5611e-05	8.39124e-05
FAM222B	2.80473	5.80513	1.04947	4.5598e-37	4.10005e-35
SSC4D	1.74665	3.65966	1.06712	0.000528567	0.000733821
PRAME	0.864906	6.46731	2.90255	1.41581e-14	4.6211e-14
BCL9	2.11422	5.66955	1.42311	6.23773e-33	2.02709e-31
PODXL2	3.49804	7.41797	1.08448	3.01421e-06	5.03098e-06
CDK1	2.20546	7.55195	1.77577	1.51657e-33	5.49594e-32
SOX9	4.67059	18.3374	1.97312	1.35688e-21	8.8238e-21
RHNO1	3.24356	7.2103	1.15248	1.39601e-37	1.41482e-35
ZFC3H1	1.20959	2.43259	1.00798	2.63503e-31	6.57878e-30
TACC1	3.80681	8.02722	1.07632	1.91718e-11	4.87923e-11
ANXA10	10.8709	3.50288	-1.63386	7.82457e-21	4.72358e-20
NR6A1	0.659212	1.5971	1.27664	1.41008e-15	5.00241e-15
CD27	1.14099	2.69105	1.23788	0.000389492	0.000546898
RASSF8	0.673047	2.11143	1.64944	4.27205e-18	1.93521e-17
COL9A2	0.400874	2.61541	2.70581	6.90577e-20	3.75733e-19
NUDT17	0.83523	1.82966	1.13133	6.55447e-23	4.87468e-22
SLC51A	20.446	8.46049	-1.273	8.21416e-16	2.97226e-15
MRE11	1.11034	2.34519	1.0787	7.04061e-42	2.63121e-39
TMEM65	1.31289	3.46504	1.40013	1.85407e-26	2.17594e-25
SERPINA11	118.789	54.0443	-1.13619	2.63065e-09	5.60883e-09
CYBA	13.4407	31.4083	1.22454	5.39562e-11	1.3174e-10
PRR11	0.859077	2.95411	1.78187	1.14458e-32	3.59265e-31
CXCL5	0.571963	7.86779	3.78196	8.51666e-07	1.48687e-06
CHST11	1.27195	2.95689	1.21704	1.61471e-08	3.24326e-08
MTHFD1L	1.74248	3.76169	1.11024	3.26143e-22	2.27028e-21
CDC25C	1.08031	2.55081	1.23951	1.68311e-20	9.79005e-20
CDT1	2.59601	6.46675	1.31674	5.75593e-26	6.30359e-25
FJX1	1.0762	2.85342	1.40675	1.89061e-05	2.9594e-05
FBLIM1	4.02927	9.39534	1.22143	2.62353e-17	1.09856e-16
SPHK1	2.21668	10.2663	2.21145	4.22438e-19	2.12445e-18
S100A6	63.7767	159.251	1.3202	2.45424e-05	3.81371e-05
CCDC93	1.85258	3.81649	1.04271	1.32631e-38	1.82315e-36
AL390728.6	2.44049	6.4141	1.39407	4.97078e-23	3.75525e-22
PDP1	0.772424	2.30417	1.57678	1.01129e-14	3.33537e-14
FBXO5	0.633056	1.81696	1.52113	1.40503e-34	6.51269e-33
PAPSS1	3.91311	7.86833	1.00774	5.51837e-26	6.07122e-25
NUP210	5.1022	11.3851	1.15796	6.4116e-30	1.26112e-28
AL157373.2	1.45845	0.620015	-1.23406	2.26365e-06	3.8225e-06
RTL6	0.916307	2.32599	1.34394	1.32447e-12	3.68355e-12
CTNND2	0.369171	3.94742	3.41855	2.43625e-19	1.25313e-18
FANCE	1.06418	2.54843	1.25986	9.59802e-29	1.57452e-27
NCK2	4.16307	13.8981	1.73917	1.24522e-23	1.00416e-22
RAPGEFL1	0.99939	2.37257	1.24733	2.16284e-20	1.24954e-19
PRR12	2.1238	4.5598	1.10232	1.17941e-31	3.10673e-30
PDE7A	0.879128	2.35443	1.42123	2.95084e-32	8.58615e-31
PRIM2	1.33495	2.67606	1.00332	1.0691e-33	4.05886e-32
CYP2A13	3.49353	0.514158	-2.7644	6.46658e-10	1.44441e-09
SMC3	6.11766	12.9725	1.08441	3.21436e-35	1.80472e-33
RNF44	3.90006	8.67956	1.15413	4.57799e-38	5.26425e-36
FAAP24	0.821335	1.65978	1.01495	4.45557e-24	3.81146e-23
CKAP2	1.77032	4.20872	1.24937	2.07529e-30	4.41608e-29
NDRG3	5.48603	12.1068	1.14199	1.38795e-34	6.45854e-33
SNAP25	0.516093	3.88378	2.91176	1.80233e-17	7.68415e-17
RAVER1	0.924286	2.46784	1.41684	6.88393e-26	7.47051e-25
MLLT6	2.99655	6.22065	1.05376	1.71056e-33	6.08827e-32
RFLNA	0.290931	2.46016	3.08	0.000388483	0.000545675
LAMC2	0.295165	3.62823	3.61967	2.38854e-06	4.02613e-06
AREG	0.539633	2.07668	1.94423	2.03535e-07	3.74473e-07
GTSF1	1.70952	4.1929	1.29436	0.00066111	0.000910645
ZNF189	4.57674	9.20678	1.00838	1.76597e-24	1.59511e-23
SLC46A3	14.4793	5.52252	-1.3906	1.22914e-18	5.85627e-18
VCAM1	4.80135	10.0192	1.06126	1.28991e-07	2.40806e-07
UNC5B	1.64157	3.37625	1.04035	1.70088e-10	3.98294e-10
ORC1	0.757926	2.43159	1.68177	5.08077e-27	6.35575e-26
MMP1	0.425683	4.41831	3.37564	3.2583e-12	8.81383e-12
C9	129.524	26.7988	-2.27299	1.35506e-10	3.19763e-10
CHD7	0.790194	1.67725	1.08582	3.19741e-25	3.18118e-24
TOR4A	1.07073	3.53233	1.72203	9.42514e-16	3.38891e-15
MIR3685	1.97386	5.08358	1.36483	2.47654e-18	1.14484e-17
RHEX	0.50743	2.57485	2.34321	3.63105e-08	7.07688e-08
ZG16	4.30633	2.00194	-1.10506	2.00307e-07	3.68818e-07
HAPLN3	0.717219	1.5829	1.14209	9.79139e-07	1.7037e-06
IQGAP1	2.47108	5.73829	1.21548	2.48081e-14	7.94112e-14
ZNF496	1.01206	2.7817	1.45867	3.73395e-26	4.20078e-25
AQP8	4.62364	1.17415	-1.97741	5.83626e-09	1.21194e-08
MIS18BP1	0.803904	1.8251	1.18288	1.91838e-29	3.5241e-28
AMIGO2	0.955481	2.1942	1.1994	2.63271e-05	4.07936e-05
PLEKHG2	1.14129	2.64762	1.21403	2.86561e-26	3.27628e-25
HSD17B6	223.2	82.6864	-1.43262	4.71212e-27	5.95061e-26
SOX4	3.2444	13.3403	2.03977	2.68554e-22	1.88587e-21
SPDL1	0.942296	2.42574	1.36417	1.83288e-38	2.43549e-36
GSTA2	157.913	69.7494	-1.17887	2.18734e-07	4.01208e-07
ROBO1	4.60494	10.1745	1.14371	2.20891e-13	6.54842e-13

## Sheet: Sheet3
Table 3: Survival associated DEGs in univariate Cox regression analysis in TCGA-LIHC cohort.
gene	HR	HR.95L	HR.95H	pvalue
AC099850.4	1.15319	1.09056	1.21942	5.65108e-07
MPZL1	1.08183	1.05109	1.11348	8.91117e-08
FUBP1	1.0888	1.04393	1.1356	7.42845e-05
CAMSAP2	1.16702	1.06717	1.2762	0.000712835
IQGAP3	1.19519	1.11163	1.28502	1.42077e-06
EXO1	1.27823	1.13337	1.44161	6.33708e-05
FLVCR1	1.24752	1.11784	1.39224	7.83951e-05
DCLRE1B	1.76034	1.39696	2.21825	1.63612e-06
LAMP5	1.074	1.02953	1.12038	0.000935668
ABCC1	1.08538	1.03599	1.13712	0.000564985
KIF4A	1.08799	1.03742	1.14102	0.000514555
TRIM45	1.45377	1.22008	1.73221	2.85427e-05
CHML	1.11993	1.04973	1.19482	0.000604589
PAFAH1B3	1.02893	1.0124	1.04574	0.000558658
TACC3	1.06169	1.03062	1.09371	7.83124e-05
CDC25A	1.41162	1.21528	1.63968	6.43324e-06
PUS7	1.2747	1.12142	1.44893	0.000204758
PGAP4	1.14637	1.07287	1.2249	5.33114e-05
GNG4	1.05231	1.0252	1.08014	0.000128843
CAD	1.22533	1.14973	1.3059	3.99377e-10
MCM2	1.04598	1.02216	1.07035	0.000130593
KPNA2	1.02905	1.0188	1.03941	2.10423e-08
MIR210HG	1.20641	1.11108	1.30992	7.89568e-06
SKP2	1.0532	1.02241	1.08491	0.000616966
TUBA1C	1.03268	1.01572	1.04992	0.000141021
BIRC5	1.02704	1.01266	1.04162	0.000208742
EIF5A2	1.19153	1.09792	1.29313	2.69853e-05
CASP2	1.33066	1.14295	1.54919	0.000231222
FXYD3	1.0608	1.02454	1.09833	0.000878688
ARNTL2	1.23074	1.09709	1.38066	0.000400377
CCNF	1.42748	1.21926	1.67125	9.67119e-06
CHEK1	1.3658	1.16299	1.60398	0.000144052
CENPO	1.42237	1.23848	1.63357	6.10103e-07
SHCBP1	1.21598	1.11542	1.3256	8.98595e-06
NUP205	1.20288	1.10104	1.31414	4.26331e-05
DOT1L	1.28087	1.11535	1.47096	0.000454444
CDK4	1.03857	1.02012	1.05735	3.48912e-05
PAQR8	1.11617	1.05431	1.18166	0.000158016
TOP2A	1.0378	1.01987	1.05603	2.99414e-05
C19orf33	1.04168	1.01819	1.0657	0.000449423
MCM5	1.05492	1.02352	1.08727	0.000523299
USP1	1.11095	1.06126	1.16296	6.58344e-06
HK2	1.06939	1.03789	1.10185	1.09376e-05
RFC4	1.09553	1.04621	1.14718	0.00010365
SUV39H2	1.42355	1.20872	1.67657	2.32625e-05
CDC6	1.11501	1.05521	1.1782	0.00010849
POGLUT2	1.10467	1.04684	1.16569	0.000284835
LPCAT1	1.0558	1.0328	1.07931	1.34659e-06
TRIP13	1.22198	1.14102	1.30867	9.91226e-09
ZIC2	1.15341	1.06741	1.24634	0.000306009
LINC00942	1.03277	1.01516	1.05068	0.000237408
CDK2	1.10321	1.04748	1.16192	0.000204451
TM4SF1	1.00608	1.00256	1.00961	0.000694155
CDC20	1.03277	1.02094	1.04475	4.18669e-08
SKA3	1.31886	1.1629	1.49573	1.62936e-05
MCM4	1.08134	1.04488	1.11906	7.8445e-06
HILPDA	1.05434	1.02646	1.08299	0.000109131
MARCKS	1.01534	1.00721	1.02353	0.000205512
MYBL2	1.04368	1.0266	1.06104	3.78361e-07
TMEM74B	1.0758	1.03349	1.11985	0.000358731
KRT17	1.02672	1.01189	1.04176	0.000380424
RACGAP1	1.10938	1.06252	1.15831	2.43321e-06
CYRIB	1.12441	1.05254	1.20117	0.000501989
IMPDH1	1.0779	1.04566	1.11113	1.28166e-06
LAPTM4B	1.01701	1.01127	1.02277	4.97919e-09
CDC7	1.30661	1.14213	1.49478	9.77859e-05
BAIAP2L2	1.02704	1.01198	1.04233	0.000400736
QSER1	1.3903	1.14553	1.68737	0.000852833
CNOT6	1.2557	1.10519	1.42671	0.000473364
ANKRD27	1.29336	1.12423	1.48793	0.000321044
KIFC1	1.06199	1.0317	1.09316	4.61648e-05
VANGL1	1.54964	1.26417	1.89958	2.48124e-05
PTTG1	1.0542	1.03182	1.07706	1.4277e-06
MCM6	1.05196	1.02538	1.07922	0.000104636
FCGBP	1.13593	1.06784	1.20837	5.31896e-05
MTF2	1.3049	1.15578	1.47326	1.72066e-05
CDCA5	1.1598	1.08949	1.23464	3.3784e-06
GPD2	1.29245	1.12226	1.48844	0.000369247
PRKDC	1.10291	1.05837	1.14933	3.20177e-06
GTSE1	1.19487	1.10444	1.2927	9.24991e-06
CDC45	1.15657	1.07686	1.24218	6.54026e-05
CDCA8	1.12613	1.08168	1.17241	7.41263e-09
SPC25	1.18408	1.08972	1.28662	6.67657e-05
NEK2	1.0994	1.04424	1.15748	0.000308483
ECT2	1.14285	1.07825	1.21131	6.86151e-06
NAA40	1.31902	1.16519	1.49316	1.20654e-05
CEP55	1.09808	1.04349	1.15553	0.000322785
RCC2	1.04045	1.0195	1.06183	0.000133148
PLK1	1.12707	1.07539	1.18124	5.89254e-07
DBF4	1.40035	1.17797	1.66471	0.000135404
CYP2C9	0.994909	0.992052	0.997774	0.000504294
LRIG3	1.11576	1.04836	1.18749	0.000570262
ESPL1	1.26824	1.12753	1.42652	7.48253e-05
CCNB2	1.08738	1.03871	1.13832	0.000336548
DNMT3A	1.24207	1.11709	1.38102	6.16532e-05
CD7	1.01373	1.00624	1.02129	0.000317223
RRM2	1.05201	1.02617	1.0785	6.43893e-05
POLA1	1.47274	1.19776	1.81085	0.000241359
LMNB1	1.0528	1.0223	1.08421	0.000603492
RPLP0P6	1.07401	1.03548	1.11397	0.000127831
HIC2	1.25206	1.099	1.42644	0.000727432
CBX2	1.32751	1.19846	1.47046	5.65487e-08
MSH2	1.17606	1.08793	1.27133	4.49281e-05
HMGA1	1.00844	1.00413	1.01276	0.000121116
POLD1	1.13257	1.06117	1.20878	0.000179147
MCM8	1.36874	1.15753	1.61849	0.000241896
HAUS6	1.31991	1.13472	1.53532	0.000319939
RFWD3	1.3029	1.11782	1.51861	0.000712217
UBE2C	1.03076	1.01823	1.04345	1.21304e-06
CKS2	1.0151	1.00863	1.02161	4.32161e-06
KIF23	1.34869	1.1882	1.53084	3.69554e-06
SPATS2	1.24037	1.11895	1.37498	4.16706e-05
ILF3	1.05109	1.02109	1.08197	0.000745115
ASF1B	1.07602	1.03081	1.12322	0.000821778
IGSF3	1.11244	1.05203	1.17631	0.000183773
H2AX	1.02626	1.0132	1.0395	7.34347e-05
NCAPG	1.26079	1.15844	1.3722	8.12313e-08
BLMH	1.08502	1.03437	1.13816	0.000822312
KIF18B	1.27432	1.1576	1.40281	7.5829e-07
BAMBI	1.01373	1.00634	1.02118	0.000261484
CKAP2L	1.41515	1.20019	1.66861	3.61435e-05
NCAPH	1.16087	1.07033	1.25907	0.000317723
P3H4	1.09428	1.0428	1.1483	0.000247947
CENPA	1.17807	1.10856	1.25193	1.28096e-07
BCORL1	1.35129	1.18524	1.5406	6.78253e-06
KHDC4	1.08538	1.03901	1.13383	0.000235138
DSCC1	1.38921	1.20068	1.60734	9.97025e-06
PBK	1.10964	1.06099	1.16053	5.42973e-06
MAD2L1	1.27392	1.13495	1.42992	3.99476e-05
UAP1L1	1.13431	1.08534	1.18549	2.18172e-08
CENPF	1.12606	1.05689	1.19975	0.000241753
PKMYT1	1.3149	1.13047	1.52942	0.000384726
A1BG	0.972287	0.956515	0.98832	0.000757324
REEP4	1.05817	1.02436	1.0931	0.00064432
KIF2C	1.14063	1.09264	1.19072	1.97595e-09
SLC1A7	1.07694	1.03874	1.11655	5.74555e-05
TPX2	1.0593	1.0396	1.07938	1.8067e-09
DLGAP5	1.18778	1.09732	1.2857	2.06537e-05
VRK2	1.33678	1.18349	1.50993	2.99735e-06
NDRG1	1.01216	1.00849	1.01583	6.48236e-11
ANLN	1.17547	1.10856	1.24641	6.41153e-08
TROAP	1.15052	1.08022	1.22538	1.30581e-05
POGK	1.09024	1.05143	1.13047	2.97292e-06
MACIR	1.17116	1.06947	1.28253	0.000651566
NDC80	1.18078	1.10184	1.26536	2.50896e-06
MAFG-DT	1.17984	1.0963	1.26975	1.01666e-05
MELK	1.19435	1.11344	1.28113	6.96395e-07
KIF20A	1.14274	1.08821	1.20001	8.88006e-08
NUP107	1.25908	1.12737	1.40618	4.37897e-05
NCAPD2	1.08908	1.05321	1.12618	5.94146e-07
CXCL1	1.00882	1.00374	1.01393	0.000648284
EZH2	1.22443	1.13431	1.32172	2.09566e-07
PYCR1	1.02545	1.01396	1.03707	1.22726e-05
RECQL4	1.13486	1.07535	1.19767	4.15665e-06
SRC	1.07319	1.03105	1.11706	0.000548476
FKBP10	1.01941	1.00847	1.03047	0.000479831
NOP56	1.0508	1.02937	1.07268	2.4494e-06
AC068987.3	1.16389	1.07131	1.26448	0.000332464
EPS8L3	1.0615	1.03868	1.08482	7.35055e-08
CPSF6	1.1802	1.0993	1.26706	4.80969e-06
NUP188	1.17484	1.07917	1.27899	0.000200789
ASRGL1	1.11792	1.0484	1.19206	0.000667336
CDCA4	1.21023	1.11016	1.31932	1.46915e-05
INCENP	1.25099	1.12442	1.3918	3.87754e-05
SMARCC1	1.09731	1.04066	1.15704	0.000595136
SNHG7	1.06934	1.02763	1.11275	0.000957134
CDCA7L	1.12853	1.06823	1.19223	1.58855e-05
LINC00665	1.19148	1.08001	1.31446	0.000472449
G6PD	1.01596	1.00947	1.02248	1.24634e-06
SMARCD1	1.11366	1.05847	1.17172	3.30853e-05
TRAIP	1.34687	1.15464	1.5711	0.000150621
SLC2A1	1.08198	1.04369	1.12167	1.8156e-05
SFR1	1.4346	1.22142	1.68498	1.09859e-05
TUFT1	1.11548	1.0529	1.18177	0.000207341
SNHG3	1.07153	1.0374	1.10678	2.87598e-05
BZW2	1.05947	1.02644	1.09356	0.000350209
TFDP1	1.03089	1.01535	1.04667	8.63825e-05
MTMR2	1.31533	1.14486	1.51119	0.00010877
STMN1	1.02076	1.00837	1.03331	0.000976619
POLR3D	1.51514	1.21181	1.89438	0.0002668
FAM83D	1.12889	1.07572	1.18469	8.43074e-07
HDAC2	1.28741	1.15536	1.43455	4.75431e-06
SLC16A3	1.07666	1.04366	1.1107	3.29913e-06
YEATS2	1.46139	1.22179	1.74797	3.28848e-05
TONSL	1.47233	1.29992	1.6676	1.14381e-09
NT5DC2	1.0305	1.01443	1.04683	0.000179073
ZWINT	1.04789	1.0238	1.07255	8.09243e-05
C4orf46	1.36315	1.13884	1.63164	0.000731991
CHORDC1	1.56152	1.2737	1.91439	1.80841e-05
TYRO3	1.27874	1.12183	1.45761	0.000232344
CHAF1B	1.24008	1.09433	1.40524	0.000743567
GTPBP2	1.07685	1.03497	1.12043	0.000254162
CCNB1	1.05073	1.02902	1.07291	3.41492e-06
CENPM	1.09742	1.04978	1.14723	4.04096e-05
AURKB	1.11293	1.06428	1.16381	2.71325e-06
UBAP2	1.48434	1.25264	1.75889	5.08248e-06
SLC25A24	1.18654	1.07659	1.30772	0.000565917
DDX11	1.40209	1.18271	1.66216	9.90453e-05
MAL2	1.01632	1.00753	1.02519	0.000261103
MCM3	1.02393	1.01072	1.03732	0.000358915
ASPM	1.11223	1.04579	1.1829	0.000713275
NRSN2	1.04806	1.02376	1.07292	8.7585e-05
SMC4	1.10105	1.04378	1.16147	0.000412341
ITGA3	1.06406	1.02714	1.10232	0.000569014
SNHG1	1.06827	1.0341	1.10357	6.84064e-05
GINS1	1.18733	1.1021	1.27914	6.23605e-06
MEX3A	1.1807	1.09357	1.27478	2.16841e-05
IFFO2	1.1384	1.05643	1.22674	0.00067509
MASTL	1.23097	1.11696	1.35662	2.78208e-05
NUF2	1.12395	1.06476	1.18644	2.30719e-05
MYCN	1.09258	1.04204	1.14557	0.000248268
SLC25A19	1.63607	1.32455	2.02086	4.92229e-06
TOPBP1	1.15381	1.07072	1.24335	0.000175526
SPINDOC	1.18087	1.11029	1.25595	1.24509e-07
WASF1	1.1599	1.09324	1.23063	9.02931e-07
AP001065.3	0.785193	0.684443	0.900773	0.000557557
PSRC1	1.21744	1.13698	1.30358	1.69932e-08
RAD51	1.33236	1.12906	1.57225	0.000681249
AFP	1.00034	1.00015	1.00052	0.000414804
KIF11	1.138	1.06629	1.21454	9.90418e-05
TMEM237	1.43015	1.18941	1.71961	0.00014214
YBX3	1.07485	1.03403	1.11728	0.000257995
ASAP1	1.16282	1.08794	1.24285	8.92367e-06
TUBA1B	1.01418	1.00676	1.02165	0.000169861
CCDC88A	1.35789	1.16091	1.58829	0.000130281
BUB1	1.24884	1.12606	1.385	2.57241e-05
UBE2T	1.06519	1.03749	1.09363	2.63837e-06
COLCA2	1.13408	1.05394	1.22031	0.000765117
HJURP	1.17837	1.10142	1.2607	1.90103e-06
GPRIN1	1.37822	1.13976	1.66656	0.000934129
MKI67	1.10127	1.06248	1.14149	1.35273e-07
BUB1B	1.15465	1.07441	1.24087	9.11247e-05
E2F5	1.95568	1.52718	2.50442	1.0633e-07
TTK	1.3022	1.16445	1.45624	3.67489e-06
UCK2	1.14153	1.09301	1.1922	2.32509e-09
HMMR	1.16349	1.10055	1.23003	9.47869e-08
LHFPL2	1.20981	1.09608	1.33535	0.000156094
NSD2	1.32565	1.15244	1.52489	7.94861e-05
HEATR1	1.18933	1.07557	1.31512	0.000724422
FIGNL1	1.40231	1.16716	1.68483	0.000305584
CDCA3	1.31341	1.18003	1.46188	6.05246e-07
CNOT11	1.04616	1.02072	1.07223	0.000326308
SKA1	1.13022	1.05598	1.20968	0.000413588
AC009005.1	1.24469	1.10178	1.40615	0.000435625
MARCKSL1	1.01209	1.00717	1.01704	1.36126e-06
UBA2	1.05364	1.02212	1.08613	0.00074583
ATP1B3	1.03354	1.01588	1.05151	0.000175981
PIAS3	1.26059	1.12558	1.41178	6.15372e-05
FOXM1	1.06441	1.03342	1.09633	3.46862e-05
RBL1	1.45956	1.18242	1.80164	0.000432115
MIR4292	1.15664	1.08179	1.23667	2.01659e-05
RAD51AP1	1.17872	1.07096	1.29731	0.000775058
FANCG	1.18775	1.079	1.30747	0.000445041
CDK1	1.08463	1.04132	1.12973	9.30941e-05
RHNO1	1.11666	1.0472	1.19072	0.000757876
NR6A1	1.32486	1.14789	1.52912	0.000120391
PRR11	1.25343	1.15575	1.35936	4.85102e-08
MTHFD1L	1.25991	1.14616	1.38494	1.70347e-06
CDT1	1.10643	1.05118	1.16458	0.000108798
FBXO5	1.33834	1.1639	1.53892	4.31324e-05
NUP210	1.0753	1.03415	1.11809	0.000265802
CKAP2	1.16566	1.07379	1.26539	0.000252598
ORC1	1.26763	1.13926	1.41046	1.34009e-05
MMP1	1.28884	1.17806	1.41003	3.13422e-08
TOR4A	1.12274	1.05237	1.19783	0.000455914
SPDL1	1.32537	1.15212	1.52466	8.10661e-05

## Sheet: Sheet4
Table 4. Survival associated DEGs identified by LASSO regression analysis.
gene	HR	HR.95L	HR.95H	pvalue
GNG4	1.05231	1.0252	1.08014	0.000128843
CAD	1.22533	1.14973	1.3059	3.99377e-10
KPNA2	1.02905	1.0188	1.03941	2.10423e-08
LPCAT1	1.0558	1.0328	1.07931	1.34659e-06
CYP2C9	0.994909	0.992052	0.997774	0.000504294
CBX2	1.32751	1.19846	1.47046	5.65487e-08
NDRG1	1.01216	1.00849	1.01583	6.48236e-11
EPS8L3	1.0615	1.03868	1.08482	7.35055e-08
FAM83D	1.12889	1.07572	1.18469	8.43074e-07
TONSL	1.47233	1.29992	1.6676	1.14381e-09
MEX3A	1.1807	1.09357	1.27478	2.16841e-05
MYCN	1.09258	1.04204	1.14557	0.000248268
E2F5	1.95568	1.52718	2.50442	1.0633e-07
UCK2	1.14153	1.09301	1.1922	2.32509e-09
MMP1	1.28884	1.17806	1.41003	3.13422e-08

## Sheet: Sheet5
Table 5. Multivariate Cox regression analysis identified six genes which were used to construct the RMScore.
gene	coef	HR	HR.95L	HR.95H	pvalue
CYP2C9	-0.00311996	0.996885	0.994041	0.999737	0.0322941
CBX2	0.103417	1.10895	0.984479	1.24917	0.0886698
NDRG1	0.00876844	1.00881	1.00404	1.01359	0.000282517
EPS8L3	0.0392149	1.03999	1.01471	1.06591	0.00179324
FAM83D	0.0517552	1.05312	0.995667	1.11388	0.0705699
MYCN	0.0596348	1.06145	0.997047	1.13001	0.0618522
